# Supplementary material for: The origin of the Canary Island Seamount Province - New ages of old seamounts
Source: PubMed Central journal article supplement — Sci Rep. 2013 Jul 1;3:2107. doi: 10.1038/srep02107 (PMC3707084; doi:10.1038/srep02107), 2013-07-01

**The origin of the Canary Island Seamount Province – New ages of old seamounts.**

**Paul van den Bogaard**

**Supplementary information**

**Supplementary information S1: Major CISP seamount coordinates**

| Longitude | Latitude |                                                              |
|-----------|----------|--------------------------------------------------------------|
| °W        | °N       |                                                              |
| -13.25    | 32.77    | Essaouira Smt. ("Lars Smt." in Geldmacher et al., 2005)      |
| -13.13    | 32.01    | unnamed Smt.                                                 |
| -12.83    | 31.76    | Rybin Smt. ("Anika Smt." in Geldmacher et al., 2005)         |
| -12.66    | 31.25    | unnamed Smt.                                                 |
| -13.62    | 31.15    | Dacia Smt.                                                   |
| -12.57    | 31.02    | unnamed Smt.                                                 |
| -12.79    | 30.98    | unnamed Smt.                                                 |
| -13.12    | 30.68    | unnamed Smt.                                                 |
| -13.36    | 30.40    | unnamed Smt. ("Nico Smt." in Geldmacher et al., 2001)        |
| -12.78    | 30.03    | Conception B.                                                |
| -14.71    | 30.17    | unnamed Smt. ("Last Minute Smt." in Geldmacher et al., 2001) |
| -15.90    | 30.15    | Selvagen G.                                                  |
| -16.00    | 30.07    | Selvagen P.                                                  |
| -13.49    | 29.20    | Lanzarote                                                    |
| -14.02    | 28.41    | Fuerteventura                                                |
| -14.78    | 28.23    | Amanay Smt.                                                  |
| -15.02    | 27.98    | Canary Ridge Smt.                                            |
| -15.60    | 27.96    | Gran Canaria                                                 |
| -16.16    | 28.09    | El Hijo Smt.                                                 |
| -16.62    | 28.27    | Tenerife                                                     |
| -17.23    | 28.13    | La Gomera                                                    |
| -17.87    | 28.73    | La Palma                                                     |
| -17.83    | 28.39    | Palma Ridge Smt.                                             |
| -18.01    | 27.73    | El Hierro                                                    |
| -18.02    | 27.43    | Hierro Ridge Smt.                                            |
| -17.78    | 27.33    | Henry Smt. ("Kiel Smt." in Schmincke & Graf, 2000)           |
| -18.62    | 27.11    | Bisabuelas Smt. ("Las Hijas Smt." in Schmincke & Graf, 2000) |
| -18.66    | 26.07    | unnamed Smt. ("Hierro Smt." in Schmincke & Graf, 2000)       |
| -19.41    | 25.37    | Echo Smt. ("Endeavour Smt." in Schmincke & Graf, 2000)       |
| -20.12    | 25.59    | The Paps SE                                                  |
| -20.34    | 25.96    | The Paps NW                                                  |
| -20.44    | 25.29    | unnamed Smt.                                                 |
| -20.70    | 23.89    | Tropic Smt.                                                  |

Geldmacher, J., Hoernle, K. A., van den Bogaard, P., Zankl, G. & Garbe-Schönberg, D. Earlier history of the >70-Ma-old Canary hotspot based on the temporal and geochemical evolution of the Selvagen Archipelago and neighboring seamounts in the eastern North Atlantic. *J. Volcanol. Geotherm. Res.* 111, 55-87 (2001).

Geldmacher, J., Hoernle, K. A., van den Bogaard, P., Duggen, S. & Werner, R. New  $^{40}\text{Ar}/^{39}\text{Ar}$  age and geochemical data from seamounts in the Canary and Madeira volcanic provinces: Support for mantle plume hypothesis. *Earth Planet. Sci. Lett.* 237, 85-101 (2005).

Schmincke, H. U. & Graf, G. DECOS/OMEX II, Cruise No. 43, 25 November 1998 -17 January 1999 Meteor Reports, 2000-1 (Univ. Hamburg), 1-99 (2000).

## Supplementary information S2: 40Ar/39Ar dating results table

| Unit                     | Sample No | Sample coordinates |           |                           | Rock type    | Phase       | Single-crystal<br>weighted mean<br>age (Ma) | ±                        | 2Sigma (Ma)<br>incl. J-error | MSWD | Probability | Number of single-<br>crystal analyses used | Alteration indices and rejection<br>criteria |                                                           |
|--------------------------|-----------|--------------------|-----------|---------------------------|--------------|-------------|---------------------------------------------|--------------------------|------------------------------|------|-------------|--------------------------------------------|----------------------------------------------|-----------------------------------------------------------|
|                          |           | Latitude           | Longitude | Water depth<br>(m.b.s.l.) |              |             | Step-heating<br>plateau age<br>(Ma)         | ±                        | 2Sigma (Ma)<br>incl. J-error |      |             |                                            | MSWD                                         | Probability                                               |
| Canary Ridge<br>Seamount | 794-1     | 27.962             | -15.023   | 1637                      | tephrite     | hornblende  | 17.8                                        | ±                        | 0.3                          | 1.60 | 0.07        | 14                                         |                                              | AI(36/37) = 2E-4 to 4E-3                                  |
|                          |           |                    |           |                           |              | matrix      | 17.7                                        | ±                        | 0.2                          | 1.30 | 0.23        | 8 to 20                                    | 76                                           | Plateau steps AI(36/39) = 1E-3 to 3E-3                    |
| El Hijo<br>Seamount      | 755-2     | 28.083             | -16.178   | 2100                      | trachybasalt | biotite     | 0.24                                        | ±                        | 0.02                         | 0.37 | 0.94        | 9 of 11                                    |                                              | 2 analyses with AI(36/39) > 2E-3 rejected                 |
|                          | 759-3     | 28.087             | -16.173   | 1884                      |              |             |                                             |                          |                              |      |             |                                            |                                              |                                                           |
| Palma Ridge<br>Seamount  | 666-2     | 28.393             | -17.833   | 1233                      | phonolite    | biotite     | 2.11                                        | ±                        | 0.03                         | 0.80 | 0.64        | 12                                         |                                              | AI(36/39) = 1E-4 to 1E-3                                  |
| Hiero Ridge<br>Seamount  | 678-2     | 27.428             | -18.018   | 1694                      | trachyte     | K-feldspar  | 133.3                                       | ±                        | 0.2                          | 1.40 | 0.12        | 18                                         |                                              | AI(36/39) = 4E-5 to 1E-3                                  |
|                          |           |                    |           |                           |              | hornblende  | 133.8                                       | ±                        | 0.6                          | 0.89 | 0.56        | 14                                         |                                              | AI(36/37) = 1E-4 to 3E-3                                  |
| Bisabuelas<br>Seamount   | 689-2     | 27.102             | -18.610   | 2862                      | trachyte     | plagioclase | 140.5                                       | ±                        | 0.7                          | 1.19 | 0.30        | 8 of 11                                    |                                              | Ca/K = 6 to 41; 3 analyses with AI(36/37) > 1E-4 rejected |
|                          | 689-5     |                    |           |                           |              | plagioclase | 141.7                                       | ±                        | 0.4                          | 1.70 | 0.10        | 9 of 13                                    |                                              | Ca/K = 4 to 5; 4 analyses with AI(36/37) > 3E-4 rejected  |
| The Paps<br>Seamount     | 706-1     | 25.648             | -20.133   | 2105                      | trachyte     | K-feldspar  | 91.1                                        | ±                        | 0.2                          | 1.30 | 0.27        | 7 to 10                                    | 52.4                                         | Plateau steps AI(36/39) = 3E-4 to 1E-3                    |
| Tropic<br>Seamount       | 699-1     | 23.788             | -20.737   | 2023                      | trachyte     | K-feldspar  | 119.3                                       | ±                        | 0.3                          | 1.01 | 0.43        | 13                                         |                                              | AI(36/39) = 6E-6 to 2E-4                                  |
|                          | 692-1     | 23.833             | -20.752   | 1875                      | basalt       | matrix      | 113.9                                       | ±                        | 0.2                          | 1.06 | 0.39        | 23 to 32                                   | 59.2                                         | Plateau steps AI(36/37) = 7E-4 to 2E-3                    |
|                          | 692-3     | 23.833             | -20.752   | 1875                      | trachyte     | K-feldspar  | 116.3                                       | ±                        | 0.2                          | 0.71 | 0.83        | 23                                         |                                              | AI(36/39) = 2E-4 to 4E-3                                  |
|                          |           |                    |           |                           |              | hornblende  | 116.6                                       | ±                        | 0.5                          | 1.30 | 0.25        | 10                                         |                                              | AI(36/37) = 2E-4 to 1E-3                                  |
|                          | 693-2     | 23.842             | -20.745   | 1142                      | trachyte     | plagioclase | 115.6                                       | ±                        | 0.5                          | 0.77 | 0.59        | 7                                          |                                              | AI(36/37) = 1E-4 to 4E-3                                  |
| hornblende               | 117.0     | ±                  | 0.5       | 0.78                      | 0.64         | 10          |                                             | AI(36/37) = 5E-5 to 8E-4 |                              |      |             |                                            |                                              |                                                           |





|                  |      |          |          |          |          |          |          |                 |                 |                 |          |          |          |
|------------------|------|----------|----------|----------|----------|----------|----------|-----------------|-----------------|-----------------|----------|----------|----------|
| 678-2 11<br>3000 | 3.00 | 2.25E+01 | 6.26E-00 | 1.64E-02 | 1.76E-15 | 1.23E+01 | 1.85E+01 | <b>9.49E-01</b> | <b>1.33E+02</b> | <b>3.48E-00</b> | 3.11E-00 | 4.15E-03 | 1.28E-01 |
| 678-2 12<br>3000 | 3.00 | 2.44E+01 | 5.24E-00 | 2.27E-02 | 2.15E-15 | 1.03E+01 | 2.50E+01 | <b>1.00E-00</b> | <b>1.33E+02</b> | <b>3.28E-00</b> | 3.38E-00 | 4.15E-03 | 1.28E-01 |

Mean age = 133.8±0.6 Ma  
(2s, including J-error of .128%)  
MSWD = 0.89, probability = 0.56

689-2 plagioclase single-crystal analyses

| Analysis         | Laser power (W) | 40Ar/39Ar | 37Ar/39Ar | 36Ar/39Ar | Mol 39ArK | Ca/K     | % 40ArA  | Cum 39ArK       | Age (Ma)        | 2 Sigma (Ma)    | Al (36/37) | J        | 2 Sigma (%) |
|------------------|-----------------|-----------|-----------|-----------|-----------|----------|----------|-----------------|-----------------|-----------------|------------|----------|-------------|
| 689-2 121<br>248 | 10.00           | 2.13E+01  | 2.05E+01  | 8.95E-03  | 5.76E-16  | 4.10E+01 | 1.91E-00 | <b>7.95E-02</b> | <b>1.42E+02</b> | <b>2.25E-00</b> | 2.58E-05   | 3.85E-03 | 1.70E-01    |
| 689-2 13<br>402  | 10.00           | 2.15E+01  | 1.61E+01  | 1.24E-02  | 1.07E-15  | 3.21E+01 | 8.92E-00 | rej.            | 1.33E+02        | 1.95E-00        | 1.55E-04   | 3.85E-03 | 1.70E-01    |
| 689-2 14<br>627  | 10.00           | 2.14E+01  | 8.69E-00  | 4.86E-03  | 2.45E-15  | 1.72E+01 | 4.18E-01 | <b>2.70E-01</b> | <b>1.41E+02</b> | <b>1.07E-00</b> | 7.33E-05   | 3.85E-03 | 1.70E-01    |
| 689-2 15<br>172  | 10.00           | 2.13E+01  | 3.12E-00  | 1.79E-03  | 1.30E-15  | 6.14E-00 | 5.98E-01 | <b>3.56E-01</b> | <b>1.42E+02</b> | <b>1.28E-00</b> | 7.88E-05   | 3.85E-03 | 1.70E-01    |
| 689-2 16<br>230  | 10.00           | 2.11E+01  | 2.05E+01  | 9.18E-03  | 5.32E-16  | 4.10E+01 | 6.72E-01 | <b>3.91E-01</b> | <b>1.40E+02</b> | <b>1.82E-00</b> | 3.04E-05   | 3.85E-03 | 1.70E-01    |
| 689-2 17<br>427  | 10.00           | 2.66E+01  | 2.75E-00  | 2.55E-02  | 3.74E-15  | 5.40E-00 | 2.73E+01 | rej.            | 1.30E+02        | 1.08E-00        | 3.44E-03   | 3.85E-03 | 1.70E-01    |
| 689-2 18<br>180  | 10.00           | 2.13E+01  | 1.41E+01  | 6.53E-03  | 5.33E-16  | 2.80E+01 | 1.85E-00 | <b>7.45E-01</b> | <b>1.41E+02</b> | <b>2.59E-00</b> | 3.65E-05   | 3.85E-03 | 1.70E-01    |
| 689-2 19<br>219  | 10.00           | 2.14E+01  | 1.02E+01  | 6.12E-03  | 7.50E-16  | 2.02E+01 | 3.25E-00 | <b>8.49E-01</b> | <b>1.40E+02</b> | <b>2.32E-00</b> | 8.89E-05   | 3.85E-03 | 1.70E-01    |
| 689-2 20<br>398  | 10.00           | 2.26E+01  | 3.05E-00  | 9.40E-03  | 3.12E-15  | 6.00E-00 | 1.08E+01 | rej.            | 1.36E+02        | 1.12E-00        | 1.04E-03   | 3.85E-03 | 1.70E-01    |
| 689-2 23<br>294  | 10.00           | 2.11E+01  | 1.99E+01  | 8.77E-03  | 6.74E-16  | 3.97E+01 | 2.02E-00 | <b>9.42E-01</b> | <b>1.41E+02</b> | <b>2.20E-00</b> | 2.80E-05   | 3.85E-03 | 1.70E-01    |
| 689-2 24<br>176  | 10.00           | 2.17E+01  | 2.05E+01  | 1.27E-02  | 4.22E-16  | 4.10E+01 | 7.00E-00 | <b>1.00E-00</b> | <b>1.37E+02</b> | <b>3.51E-00</b> | 9.63E-05   | 3.85E-03 | 1.70E-01    |

Mean age = 140.5±0.7 Ma  
(2s, including J-error of .17%)  
MSWD = 1.19, probability = 0.30

689-5 plagioclase single-crystal analyses

| Analysis         | Laser power (W) | 40Ar/39Ar | 37Ar/39Ar | 36Ar/39Ar | Mol 39ArK | Ca/K     | % 40ArA  | Cum 39ArK       | Age (Ma)        | 2 Sigma (Ma)    | Al (36/37) | J        | 2 Sigma (%) |
|------------------|-----------------|-----------|-----------|-----------|-----------|----------|----------|-----------------|-----------------|-----------------|------------|----------|-------------|
| 689-5 130<br>68  | 10.00           | 2.12E+01  | 2.19E-00  | 1.66E-03  | 6.18E-16  | 4.30E-00 | 1.19E-00 | <b>3.99E-02</b> | <b>1.43E+02</b> | <b>1.31E-00</b> | 1.52E-04   | 3.92E-03 | 2.30E-01    |
| 689-5 121<br>305 | 10.00           | 2.12E+01  | 2.13E-00  | 2.56E-03  | 2.81E-15  | 4.19E-00 | 2.47E-00 | rej.            | 1.41E+02        | 7.43E-01        | 3.25E-04   | 3.92E-03 | 2.30E-01    |
| 689-5 122<br>174 | 10.00           | 2.12E+01  | 2.08E-00  | 2.37E-03  | 1.64E-15  | 4.09E-00 | 2.24E-00 | 1.46E-01        | <b>1.41E+02</b> | <b>1.06E-00</b> | 3.02E-04   | 3.92E-03 | 2.30E-01    |
| 689-5 123<br>209 | 10.00           | 2.11E+01  | 1.86E-00  | 1.30E-03  | 2.11E-15  | 3.66E-00 | 8.52E-01 | 2.82E-01        | <b>1.42E+02</b> | <b>8.34E-01</b> | 1.28E-04   | 3.92E-03 | 2.30E-01    |
| 689-5 124<br>145 | 10.00           | 2.10E+01  | 2.26E-00  | 1.11E-03  | 1.34E-15  | 4.45E-00 | 3.89E-01 | 3.68E-01        | <b>1.43E+02</b> | <b>1.09E-00</b> | 4.79E-05   | 3.92E-03 | 2.30E-01    |
| 689-5 125<br>137 | 10.00           | 2.18E+01  | 2.29E-00  | 4.52E-03  | 1.31E-15  | 4.49E-00 | 4.98E-00 | rej.            | 1.41E+02        | 1.11E-00        | 6.30E-04   | 3.92E-03 | 2.30E-01    |
| 689-5 126<br>312 | 10.00           | 2.11E+01  | 2.16E-00  | 1.69E-03  | 2.91E-15  | 4.25E-00 | 1.25E-00 | 5.56E-01        | <b>1.42E+02</b> | <b>7.00E-01</b> | 1.62E-04   | 3.92E-03 | 2.30E-01    |
| 689-5 127<br>293 | 10.00           | 2.09E+01  | 1.99E-00  | 1.15E-03  | 2.84E-15  | 3.90E-00 | 5.92E-01 | 7.39E-01        | <b>1.42E+02</b> | <b>6.29E-01</b> | 8.28E-05   | 3.92E-03 | 2.30E-01    |
| 689-5 128<br>356 | 10.00           | 2.17E+01  | 2.46E-00  | 5.97E-03  | 3.24E-15  | 4.83E-00 | 6.90E-00 | rej.            | 1.38E+02        | 4.96E-01        | 8.08E-04   | 3.92E-03 | 2.30E-01    |
| 689-5 129<br>202 | 10.00           | 2.20E+01  | 2.21E-00  | 4.60E-03  | 1.48E-15  | 4.34E-00 | 5.09E-00 | rej.            | 1.42E+02        | 1.09E-00        | 6.71E-04   | 3.92E-03 | 2.30E-01    |
| 689-5 130<br>186 | 10.00           | 2.11E+01  | 2.18E-00  | 2.16E-03  | 1.81E-15  | 4.28E-00 | 1.90E-00 | 8.56E-01        | <b>1.41E+02</b> | <b>9.81E-01</b> | 2.44E-04   | 3.92E-03 | 2.30E-01    |
| 689-5 131<br>95  | 10.00           | 2.10E+01  | 1.91E-00  | 7.27E-04  | 9.93E-16  | 3.75E-00 | 3.17E-02 | 9.20E-01        | <b>1.43E+02</b> | <b>1.71E-00</b> | 4.66E-06   | 3.92E-03 | 2.30E-01    |
| 689-5 132<br>120 | 10.00           | 2.10E+01  | 2.00E-00  | 1.78E-03  | 1.24E-15  | 3.93E-00 | 1.47E-00 | 1.00E-00        | <b>1.41E+02</b> | <b>1.36E-00</b> | 2.05E-04   | 3.92E-03 | 2.30E-01    |

Mean age = 141.7±0.4 Ma  
(2s, including J-error of .23%)  
MSWD = 1.7, probability = 0.098

706-1 K-feldspar step-heating analysis

| Heating step     | Laser power (W) | 40Ar/39Ar | 37Ar/39Ar | 36Ar/39Ar | Mol 39ArK | Ca/K      | % 40ArA  | Cum 39ArK       | Age (Ma)        | 2 Sigma (Ma)    | Al (36/39) | J        | 2 Sigma (%) |
|------------------|-----------------|-----------|-----------|-----------|-----------|-----------|----------|-----------------|-----------------|-----------------|------------|----------|-------------|
| 706-1 1<br>150   | 0.15            | 4.12E+01  | 2.29E-01  | 8.35E-02  | 3.06E-15  | 4.49E-01  | 5.99E+01 | 5.94E-03        | 1.19E+02        | 3.40E-00        | 3.46E-02   | 4.14E-03 | 0.135       |
| 706-1 1<br>250   | 0.25            | 3.05E+01  | 2.37E-01  | 4.93E-02  | 9.81E-15  | 4.64E-01  | 4.78E+01 | 2.49E-02        | 1.15E+02        | 1.98E-00        | 2.04E-02   | 4.14E-03 | 0.135       |
| 706-1 1<br>400   | 0.40            | 1.78E+01  | 9.76E-02  | 1.37E-02  | 2.64E-14  | 1.91E-01  | 2.27E+01 | 7.61E-02        | 9.96E+01        | 7.78E-01        | 5.66E-03   | 4.14E-03 | 0.135       |
| 706-1 1<br>500   | 0.50            | 1.36E+01  | 2.09E-02  | 2.16E-03  | 2.79E-14  | 4.09E-02  | 4.68E-00 | 1.30E-01        | 9.42E+01        | 5.36E-01        | 8.94E-04   | 4.14E-03 | 0.135       |
| 706-1 1<br>600   | 0.60            | 1.32E+01  | 1.81E-02  | 1.42E-03  | 3.64E-14  | 3.54E-02  | 3.18E-00 | 2.01E-01        | 9.28E+01        | 3.78E-01        | 5.89E-04   | 4.14E-03 | 0.135       |
| 706-1 1<br>800   | 0.80            | 1.30E+01  | 3.14E-02  | 1.30E-03  | 8.08E-14  | 6.15E-02  | 2.93E-00 | 3.57E-01        | 9.20E+01        | 2.34E-01        | 5.40E-04   | 4.14E-03 | 0.135       |
| 706-1 1<br>1000  | 1.00            | 1.28E+01  | 2.22E-02  | 7.39E-04  | 8.50E-14  | 4.36E-02  | 1.69E-00 | <b>5.22E-01</b> | <b>9.13E+01</b> | <b>3.00E-01</b> | 3.06E-04   | 4.14E-03 | 0.135       |
| 706-1 1<br>1200  | 1.20            | 1.28E+01  | 1.04E-02  | 9.55E-04  | 6.52E-14  | 2.04E-02  | 2.19E-00 | <b>6.48E-01</b> | <b>9.12E+01</b> | <b>2.37E-01</b> | 3.95E-04   | 4.14E-03 | 0.135       |
| 706-1 1<br>1500  | 1.50            | 1.30E+01  | 3.03E-03  | 1.70E-03  | 6.33E-14  | 5.93E-03  | 3.86E-00 | <b>7.71E-01</b> | <b>9.11E+01</b> | <b>2.36E-01</b> | 7.05E-04   | 4.14E-03 | 0.135       |
| 706-1 1<br>2000  | 2.00            | 1.33E+01  | 8.03E-03  | 2.44E-03  | 5.68E-14  | 1.57E-02  | 5.42E-00 | <b>8.81E-01</b> | <b>9.17E+01</b> | <b>4.76E-01</b> | 1.01E-03   | 4.14E-03 | 0.135       |
| 706-1 1<br>3000  | 3.00            | 1.36E+01  | 5.56E-03  | 2.57E-03  | 2.88E-14  | 1.09E-02  | 5.57E-00 | 9.37E-01        | 9.35E+01        | 4.17E-01        | 1.06E-03   | 4.14E-03 | 0.135       |
| 706-1 1<br>4000  | 4.00            | 1.43E+01  | 3.21E-03  | 3.81E-03  | 1.22E-14  | 6.30E-03  | 7.89E-00 | 9.61E-01        | 9.55E+01        | 6.48E-01        | 1.58E-03   | 4.14E-03 | 0.135       |
| 706-1 1<br>6000  | 6.00            | 1.43E+01  | 5.81E-03  | 4.03E-03  | 1.24E-14  | 1.14E-02  | 8.32E-00 | 9.85E-01        | 9.53E+01        | 6.60E-01        | 1.67E-03   | 4.14E-03 | 0.135       |
| 706-1 1<br>8000  | 8.00            | 1.42E+01  | 3.99E-04  | 4.07E-03  | 4.52E-15  | 7.83E-04  | 8.51E-00 | 9.94E-01        | 9.41E+01        | 1.21E-00        | 1.69E-03   | 4.14E-03 | 0.135       |
| 706-1 1<br>10000 | 10.00           | 1.43E+01  | 1.01E-04  | 5.24E-03  | 2.31E-15  | 1.97E-04  | 1.09E+01 | 9.98E-01        | 9.24E+01        | 2.38E-00        | 2.17E-03   | 4.14E-03 | 0.135       |
| 706-1 1<br>12000 | 12.00           | 1.15E+01  | 2.35E-02  | 1.45E-03  | 1.50E-16  | 4.60E-02  | 3.70E-00 | 9.98E-01        | 8.08E+01        | 4.30E+01        | 6.00E-04   | 4.14E-03 | 0.135       |
| 706-1 1<br>15000 | 15.00           | 1.36E+01  | -8.37E-03 | 2.25E-03  | 8.81E-16  | -1.64E-02 | 4.90E-00 | 1.00E-00        | 9.39E+01        | 6.08E-00        | 9.31E-04   | 4.14E-03 | 0.135       |



MSWD = 1.06, probability = 0.39  
59.2% of the 39Ar, steps 23 through 32

692-3 hornblende single-crystal analyses

| Analysis         | Laser power (W) | 40Ar/39Ar | 37Ar/39Ar | 36Ar/39Ar | Mol 39ArK | Ca/K     | % 40ArA  | Cum 39ArK | Age (Ma) | 2 Sigma (Ma) | Al(36/37) | J        | 2 Sigma (%) |
|------------------|-----------------|-----------|-----------|-----------|-----------|----------|----------|-----------|----------|--------------|-----------|----------|-------------|
| 692-3 26<br>3000 | 3.00E-00        | 2.07E+01  | 4.37E-00  | 1.65E-02  | 3.16E-15  | 8.60E-00 | 2.12E+01 | 9.25E-02  | 1.18E+02 | 2.54E-00     | 1.41E-03  | 4.14E-03 | 1.35E-01    |
| 692-3 62<br>3000 | 3.00E-00        | 1.85E+01  | 4.44E-00  | 9.57E-03  | 4.40E-15  | 8.74E-00 | 1.26E+01 | 2.22E-01  | 1.17E+02 | 1.17E-00     | 7.33E-04  | 4.14E-03 | 1.35E-01    |
| 692-3 63<br>3000 | 3.00E-00        | 1.75E+01  | 4.22E-00  | 6.16E-03  | 3.49E-15  | 8.31E-00 | 7.70E-00 | 3.24E-01  | 1.17E+02 | 1.80E-00     | 4.45E-04  | 4.14E-03 | 1.35E-01    |
| 692-3 65<br>3000 | 3.00E-00        | 1.86E+01  | 4.53E-00  | 1.01E-02  | 2.97E-15  | 8.92E-00 | 1.34E+01 | 4.11E-01  | 1.17E+02 | 2.09E-00     | 7.68E-04  | 4.14E-03 | 1.35E-01    |
| 692-3 66<br>3000 | 3.00E-00        | 1.78E+01  | 4.17E-00  | 7.82E-03  | 5.04E-15  | 8.20E-00 | 1.04E+01 | 5.59E-01  | 1.16E+02 | 1.18E-00     | 6.17E-04  | 4.14E-03 | 1.35E-01    |
| 692-3 67<br>3000 | 3.00E-00        | 1.67E+01  | 3.63E-00  | 4.26E-03  | 2.37E-15  | 7.14E-00 | 5.10E-00 | 6.28E-01  | 1.15E+02 | 2.33E-00     | 3.26E-04  | 4.14E-03 | 1.35E-01    |
| 692-3 69<br>3000 | 3.00E-00        | 1.74E+01  | 4.64E-00  | 5.68E-03  | 4.02E-15  | 9.12E-00 | 6.68E-00 | 7.49E-01  | 1.18E+02 | 1.40E-00     | 3.48E-04  | 4.14E-03 | 1.35E-01    |
| 692-3 70<br>3000 | 3.00E-00        | 1.66E+01  | 3.36E-00  | 2.97E-03  | 4.91E-15  | 6.62E-00 | 3.01E-00 | 8.93E-01  | 1.17E+02 | 1.31E-00     | 2.06E-04  | 4.14E-03 | 1.35E-01    |
| 692-3 71<br>3000 | 3.00E-00        | 1.66E+01  | 3.50E-00  | 2.89E-03  | 2.96E-15  | 6.88E-00 | 2.79E-00 | 9.79E-01  | 1.17E+02 | 1.90E-00     | 1.83E-04  | 4.14E-03 | 1.35E-01    |
| 692-3 72<br>3000 | 3.00E-00        | 1.74E+01  | 4.97E-00  | 3.84E-03  | 7.07E-16  | 9.79E-00 | 3.33E-00 | 1.00E-00  | 1.22E+02 | 7.30E-00     | 1.61E-04  | 4.14E-03 | 1.35E-01    |

Mean age = 116.8±0.5 Ma  
(2s, including J-error of .135%)  
MSWD = 1.3, probability = 0.25

692-3 K-feldspar single-crystal analyses

| Analysis        | Laser power (W) | 40Ar/39Ar | 37Ar/39Ar | 36Ar/39Ar | Mol 39ArK | Ca/K     | % 40ArA  | Cum 39ArK       | Age (Ma)        | 2 Sigma (Ma)    | Al (36/39) | J        | 2 Sigma (%) |
|-----------------|-----------------|-----------|-----------|-----------|-----------|----------|----------|-----------------|-----------------|-----------------|------------|----------|-------------|
| 692-3 25<br>98  | 10.00           | 1.68E+01  | 9.95E-01  | 2.89E-03  | 3.48E-15  | 1.95E-00 | 4.43E-00 | <b>1.54E-02</b> | <b>1.16E+02</b> | <b>1.51E-00</b> | 1.04E-03   | 4.14E-03 | 1.35E-01    |
| 692-3 49<br>186 | 10.00           | 1.68E+01  | 2.18E-01  | 2.17E-03  | 9.45E-15  | 4.27E-01 | 3.68E-00 | <b>5.71E-02</b> | <b>1.17E+02</b> | <b>6.79E-01</b> | 8.63E-04   | 4.14E-03 | 1.35E-01    |
| 692-3 50<br>176 | 10.00           | 1.65E+01  | 8.73E-02  | 1.09E-03  | 1.55E-14  | 1.71E-01 | 1.90E-00 | <b>1.26E-01</b> | <b>1.17E+02</b> | <b>5.21E-01</b> | 4.39E-04   | 4.14E-03 | 1.35E-01    |
| 692-3 51<br>231 | 10.00           | 1.65E+01  | 6.95E-02  | 1.33E-03  | 2.26E-14  | 1.36E-01 | 2.34E-00 | <b>2.25E-01</b> | <b>1.16E+02</b> | <b>4.88E-01</b> | 5.41E-04   | 4.14E-03 | 1.35E-01    |
| 692-3 52<br>330 | 10.00           | 1.68E+01  | 1.61E-01  | 2.24E-03  | 2.12E-14  | 3.16E-01 | 3.84E-00 | <b>3.19E-01</b> | <b>1.17E+02</b> | <b>3.60E-01</b> | 9.03E-04   | 4.14E-03 | 1.35E-01    |
| 692-3 53<br>242 | 10.00           | 1.71E+01  | 7.67E-01  | 3.72E-03  | 8.39E-15  | 1.51E-00 | 5.95E-00 | <b>3.56E-01</b> | <b>1.16E+02</b> | <b>6.72E-01</b> | 1.42E-03   | 4.14E-03 | 1.35E-01    |
| 692-3 54<br>253 | 10.00           | 1.63E+01  | 7.71E-02  | 7.09E-04  | 2.39E-14  | 1.51E-01 | 1.23E-00 | <b>4.61E-01</b> | <b>1.17E+02</b> | <b>3.17E-01</b> | 2.81E-04   | 4.14E-03 | 1.35E-01    |
| 692-3 55<br>172 | 10.00           | 1.63E+01  | 4.95E-02  | 5.68E-04  | 1.25E-14  | 9.70E-02 | 9.95E-01 | <b>5.17E-01</b> | <b>1.17E+02</b> | <b>4.86E-01</b> | 2.27E-04   | 4.14E-03 | 1.35E-01    |
| 692-3 56<br>397 | 10.00           | 1.76E+01  | 1.69E-01  | 5.27E-03  | 2.70E-14  | 3.32E-01 | 8.74E-00 | <b>6.36E-01</b> | <b>1.16E+02</b> | <b>4.25E-01</b> | 2.16E-03   | 4.14E-03 | 1.35E-01    |
| 692-3 57<br>64  | 10.00           | 1.70E+01  | 2.21E-01  | 3.23E-03  | 4.11E-15  | 4.34E-01 | 5.45E-00 | <b>6.54E-01</b> | <b>1.16E+02</b> | <b>1.46E-00</b> | 1.30E-03   | 4.14E-03 | 1.35E-01    |
| 692-3 58<br>70  | 10.00           | 1.66E+01  | 2.06E-01  | 1.58E-03  | 4.76E-15  | 4.04E-01 | 2.68E-00 | <b>6.75E-01</b> | <b>1.17E+02</b> | <b>1.08E-00</b> | 6.22E-04   | 4.14E-03 | 1.35E-01    |
| 692-3 59<br>373 | 10.00           | 1.91E+01  | 1.82E-01  | 1.00E-02  | 2.55E-14  | 3.57E-01 | 1.54E+01 | <b>7.87E-01</b> | <b>1.17E+02</b> | <b>5.53E-01</b> | 4.13E-03   | 4.14E-03 | 1.35E-01    |
| 692-3 60<br>128 | 10.00           | 1.64E+01  | 8.89E-02  | 7.43E-04  | 1.20E-14  | 1.74E-01 | 1.28E-00 | <b>8.40E-01</b> | <b>1.17E+02</b> | <b>4.20E-01</b> | 2.94E-04   | 4.14E-03 | 1.35E-01    |
| 692-3 133<br>61 | 10.00           | 1.68E+01  | 2.27E-01  | 1.85E-03  | 4.29E-15  | 4.45E-01 | 3.11E-00 | <b>8.59E-01</b> | <b>1.17E+02</b> | <b>1.86E-00</b> | 7.30E-04   | 4.14E-03 | 1.35E-01    |
| 692-3 134<br>65 | 10.00           | 1.62E+01  | 1.28E-01  | 7.76E-04  | 5.31E-15  | 2.52E-01 | 1.32E-00 | <b>8.83E-01</b> | <b>1.16E+02</b> | <b>1.30E-00</b> | 3.01E-04   | 4.14E-03 | 1.35E-01    |
| 692-3 135<br>41 | 10.00           | 1.65E+01  | 9.45E-02  | 5.90E-04  | 3.26E-15  | 1.85E-01 | 9.96E-01 | <b>8.97E-01</b> | <b>1.18E+02</b> | <b>2.00E-00</b> | 2.30E-04   | 4.14E-03 | 1.35E-01    |
| 692-3 136<br>26 | 10.00           | 1.69E+01  | 3.11E-01  | 3.57E-03  | 1.87E-15  | 6.09E-01 | 6.04E-00 | <b>9.05E-01</b> | <b>1.15E+02</b> | <b>3.85E-00</b> | 1.43E-03   | 4.14E-03 | 1.35E-01    |
| 692-3 137<br>58 | 10.00           | 1.65E+01  | 1.67E-01  | 1.66E-03  | 3.81E-15  | 3.28E-01 | 2.87E-00 | <b>9.22E-01</b> | <b>1.16E+02</b> | <b>1.77E-00</b> | 6.62E-04   | 4.14E-03 | 1.35E-01    |
| 692-3 138<br>22 | 10.00           | 1.67E+01  | 1.87E-01  | 2.68E-03  | 2.28E-15  | 3.67E-01 | 4.60E-00 | <b>9.32E-01</b> | <b>1.15E+02</b> | <b>2.36E-00</b> | 1.08E-03   | 4.14E-03 | 1.35E-01    |
| 692-3 139<br>23 | 10.00           | 1.63E+01  | 1.23E-01  | 8.73E-04  | 2.92E-15  | 2.40E-01 | 1.50E-00 | <b>9.45E-01</b> | <b>1.16E+02</b> | <b>2.07E-00</b> | 3.42E-04   | 4.14E-03 | 1.35E-01    |
| 692-3 140<br>53 | 10.00           | 1.66E+01  | 2.12E-01  | 1.10E-03  | 3.49E-15  | 4.15E-01 | 1.82E-00 | <b>9.60E-01</b> | <b>1.17E+02</b> | <b>1.72E-00</b> | 4.21E-04   | 4.14E-03 | 1.35E-01    |
| 692-3 141<br>51 | 10.00           | 1.65E+01  | 1.76E-01  | 1.34E-03  | 4.49E-15  | 3.44E-01 | 2.29E-00 | <b>9.80E-01</b> | <b>1.16E+02</b> | <b>1.04E-00</b> | 5.29E-04   | 4.14E-03 | 1.35E-01    |
| 692-3 144<br>46 | 10.00           | 1.65E+01  | 1.48E-01  | 1.53E-03  | 4.49E-15  | 2.89E-01 | 2.65E-00 | <b>1.00E-00</b> | <b>1.16E+02</b> | <b>1.24E-00</b> | 6.12E-04   | 4.14E-03 | 1.35E-01    |

Mean age = 116.3±0.2 Ma  
(2s, including J-error of .135%)  
MSWD = 0.71, probability = 0.83

693-2 plagioclase single-crystal analyses

| Analysis          | Laser power (W) | 40Ar/39Ar | 37Ar/39Ar | 36Ar/39Ar | Mol 39ArK | Ca/K     | % 40ArA  | Cum 39ArK       | Age (Ma)        | 2 Sigma (Ma)    | Al (36/37) | J        | 2 Sigma (%) |
|-------------------|-----------------|-----------|-----------|-----------|-----------|----------|----------|-----------------|-----------------|-----------------|------------|----------|-------------|
| 693-2 90<br>10000 | 10.00           | 1.66E+01  | 1.49E-00  | 2.18E-03  | 4.55E-15  | 2.93E-00 | 2.89E-00 | <b>1.52E-01</b> | <b>1.16E+02</b> | <b>1.01E-00</b> | 4.52E-04   | 4.14E-03 | 1.35E-01    |
| 693-2 101<br>477  | 10.00           | 1.73E+01  | 3.44E-00  | 2.87E-03  | 7.47E-15  | 6.77E-00 | 2.73E-00 | <b>4.02E-01</b> | <b>1.16E+02</b> | <b>4.11E-01</b> | 1.82E-04   | 3.92E-03 | 2.30E-01    |
| 693-2 102<br>266  | 10.00           | 1.71E+01  | 2.54E-00  | 1.84E-03  | 2.98E-15  | 5.00E-00 | 1.55E-00 | <b>5.02E-01</b> | <b>1.16E+02</b> | <b>7.01E-01</b> | 1.39E-04   | 3.92E-03 | 2.30E-01    |
| 693-2 103<br>129  | 10.00           | 1.71E+01  | 1.24E-00  | 7.71E-04  | 2.27E-15  | 2.44E-00 | 5.41E-01 | <b>5.78E-01</b> | <b>1.17E+02</b> | <b>8.00E-01</b> | 9.88E-05   | 3.92E-03 | 2.30E-01    |
| 693-2 104<br>165  | 10.00           | 1.70E+01  | 6.83E-01  | 4.23E-04  | 3.93E-15  | 1.34E-00 | 2.98E-01 | <b>7.09E-01</b> | <b>1.16E+02</b> | <b>4.32E-01</b> | 9.85E-05   | 3.92E-03 | 2.30E-01    |
| 693-2 1<br>168    | 10.00           | 1.84E+01  | 6.03E-01  | 5.12E-03  | 3.43E-15  | 1.18E-00 | 7.88E-00 | <b>8.24E-01</b> | <b>1.16E+02</b> | <b>5.42E-01</b> | 3.18E-03   | 3.92E-03 | 2.30E-01    |
| 693-2 11<br>251   | 10.00           | 1.90E+01  | 7.13E-01  | 7.77E-03  | 5.25E-15  | 1.40E-00 | 1.17E+01 | <b>1.00E-00</b> | <b>1.15E+02</b> | <b>4.16E-01</b> | 4.13E-03   | 3.92E-03 | 2.30E-01    |

Mean age = 115.6±0.5 Ma (2s, including J-error of .230%)  
MSWD = 0.77, probability = 0.59

693-2 hornblende single-crystal analyses



| Analysis         | Laser power (W) | 40Ar/39Ar | 37Ar/39Ar | 36Ar/39Ar | Mol 39ArK | Ca/K     | % 40ArA  | Cum 39ArK        | Age (Ma)        | 2 Sigma (Ma)    | AI (36/37) | J        | 2 Sigma (%) |
|------------------|-----------------|-----------|-----------|-----------|-----------|----------|----------|------------------|-----------------|-----------------|------------|----------|-------------|
| 693-2 1<br>3000  | 3.00            | 1.87E+01  | 3.89E-00  | 9.49E-03  | 4.71E-15  | 7.65E-00 | 1.27E+01 | <b>9.96E-02</b>  | <b>1.18E+02</b> | <b>1.76E-00</b> | 8.45E-04   | 4.14E-03 | 1.35E-01    |
| 693-2 2<br>3000  | 3.00            | 1.66E+01  | 4.58E-00  | 3.37E-03  | 4.03E-15  | 9.01E-00 | 2.92E-00 | <b>1.85E-01</b>  | <b>1.17E+02</b> | <b>1.24E-00</b> | 1.39E-04   | 4.14E-03 | 1.35E-01    |
| 693-2 3<br>3000  | 3.00            | 1.66E+01  | 4.29E-00  | 3.21E-03  | 4.26E-15  | 8.43E-00 | 2.85E-00 | <b>2.75E-01</b>  | <b>1.17E+02</b> | <b>1.65E-00</b> | 1.45E-04   | 4.14E-03 | 1.35E-01    |
| 693-2 4<br>3000  | 3.00            | 1.66E+01  | 4.42E-00  | 2.88E-03  | 5.28E-15  | 8.69E-00 | 2.16E-00 | <b>3.86E-01</b>  | <b>1.18E+02</b> | <b>1.28E-00</b> | 1.05E-04   | 4.14E-03 | 1.35E-01    |
| 693-2 5<br>3000  | 3.00            | 1.69E+01  | 3.96E-00  | 3.54E-03  | 1.37E-15  | 7.80E-00 | 3.56E-00 | <b>4.15E-01</b>  | <b>1.18E+02</b> | <b>4.28E-00</b> | 2.04E-04   | 4.14E-03 | 1.35E-01    |
| 693-2 7<br>3000  | 3.00            | 1.65E+01  | 4.37E-00  | 2.28E-03  | 3.72E-15  | 8.61E-00 | 1.13E-00 | <b>5.97E-01</b>  | <b>1.18E+02</b> | <b>2.19E-00</b> | 5.06E-05   | 4.14E-03 | 1.35E-01    |
| 693-2 8<br>3000  | 3.00            | 1.70E+01  | 4.86E-00  | 4.56E-03  | 5.31E-15  | 9.56E-00 | 4.75E-00 | <b>7.09E-01</b>  | <b>1.17E+02</b> | <b>1.63E-00</b> | 2.23E-04   | 4.14E-03 | 1.35E-01    |
| 693-2 9<br>3000  | 3.00            | 1.68E+01  | 2.98E-00  | 3.40E-03  | 7.39E-15  | 5.86E-00 | 4.02E-00 | <b>8.65E-01</b>  | <b>1.16E+02</b> | <b>1.23E-00</b> | 3.07E-04   | 4.14E-03 | 1.35E-01    |
| 693-2 10<br>3000 | 3.00            | 1.71E+01  | 5.06E-00  | 4.48E-03  | 3.49E-15  | 9.97E-00 | 4.44E-00 | <b>9.39E-01</b>  | <b>1.19E+02</b> | <b>2.59E-00</b> | 2.01E-04   | 4.14E-03 | 1.35E-01    |
| 693-2 11<br>3000 | 3.00            | 1.70E+01  | 4.18E-00  | 4.16E-03  | 2.88E-15  | 8.23E-00 | 4.49E-00 | <b>10.00E-01</b> | <b>1.18E+02</b> | <b>2.38E-00</b> | 2.46E-04   | 4.14E-03 | 1.35E-01    |

Mean age = 117.0±0.5 Ma  
(2s. including J-error of .135%)  
MSWD = 0.78, probability = 0.64

Single-crystal and heating-step isotope ratios, ages and J-values are calculated with a TCR monitor age of 27.92 Ma. Mean and plateau ages are recalculated to TCR-2 monitor age of 27.87 Ma (Lanphere & Dalrymple, 2000) and include J-error. Accepted single-crystal analyses and plateau steps boldface. MSWD =  $\sum S_i^2 / (n-1)$ . Probability from Chi Square tables. Alteration indices (Baksi, 2007) for K-feldspar, biotite, K-rich matrix (Ca/K<1) are here calculated as  $AI(36/39) = [(36Ar/39Ar) - (36Ar/37Ar)Ca \times (37Ar/39Ar)] \times (J/0.01)$ . Alteration indices for plagioclase, hornblende, Ca-rich matrix (Ca/K>1) are calculated as  $AI(36/37) = [(36Ar/39Ar) - (36Ar/37Ar)Ca \times (37Ar/39Ar)] \times (J/0.01) / (37Ar/39Ar)$ .  $(36Ar/37Ar)Ca = 0.0004$ .

**Supplementary information S4: Age spectra, Ca/K-ratios, %<sup>40</sup>Ar<sub>atm</sub>, and isotope correlation diagrams (inverse isochrons; x-values scaled to J = 1E-3).**

### 794-1 hornblende single-crystal analyses

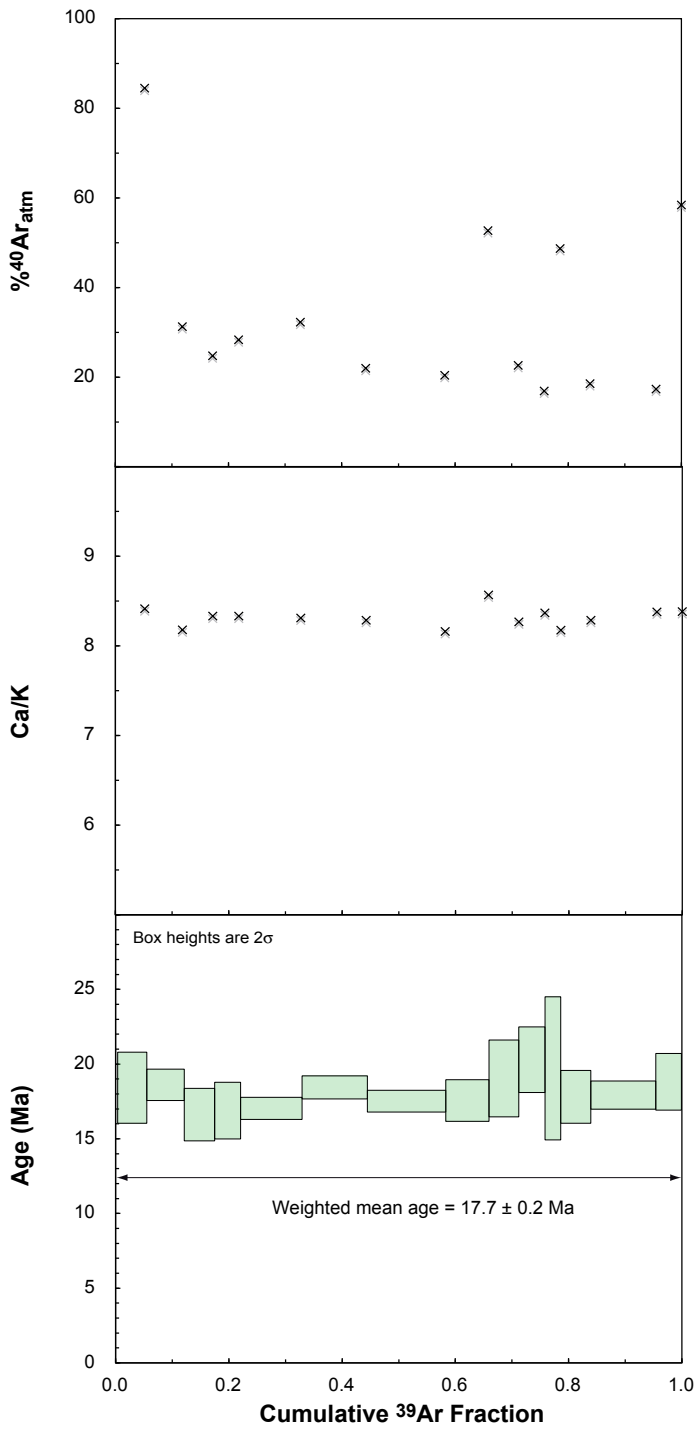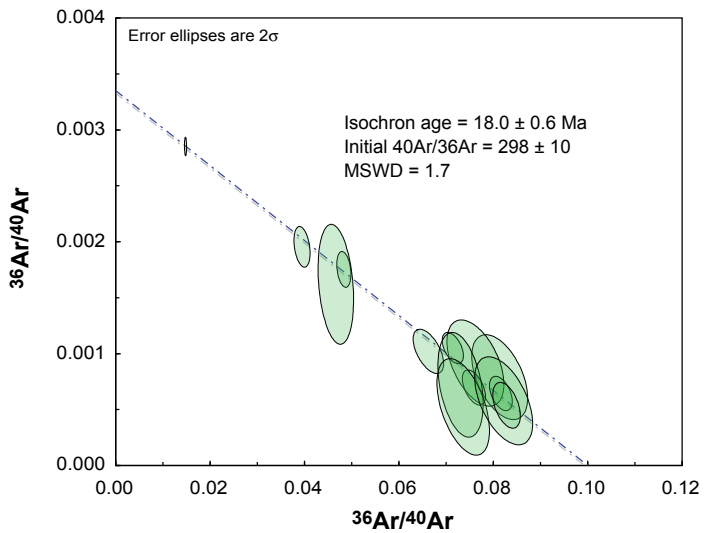

### 794-1 matrix step-heating analysis

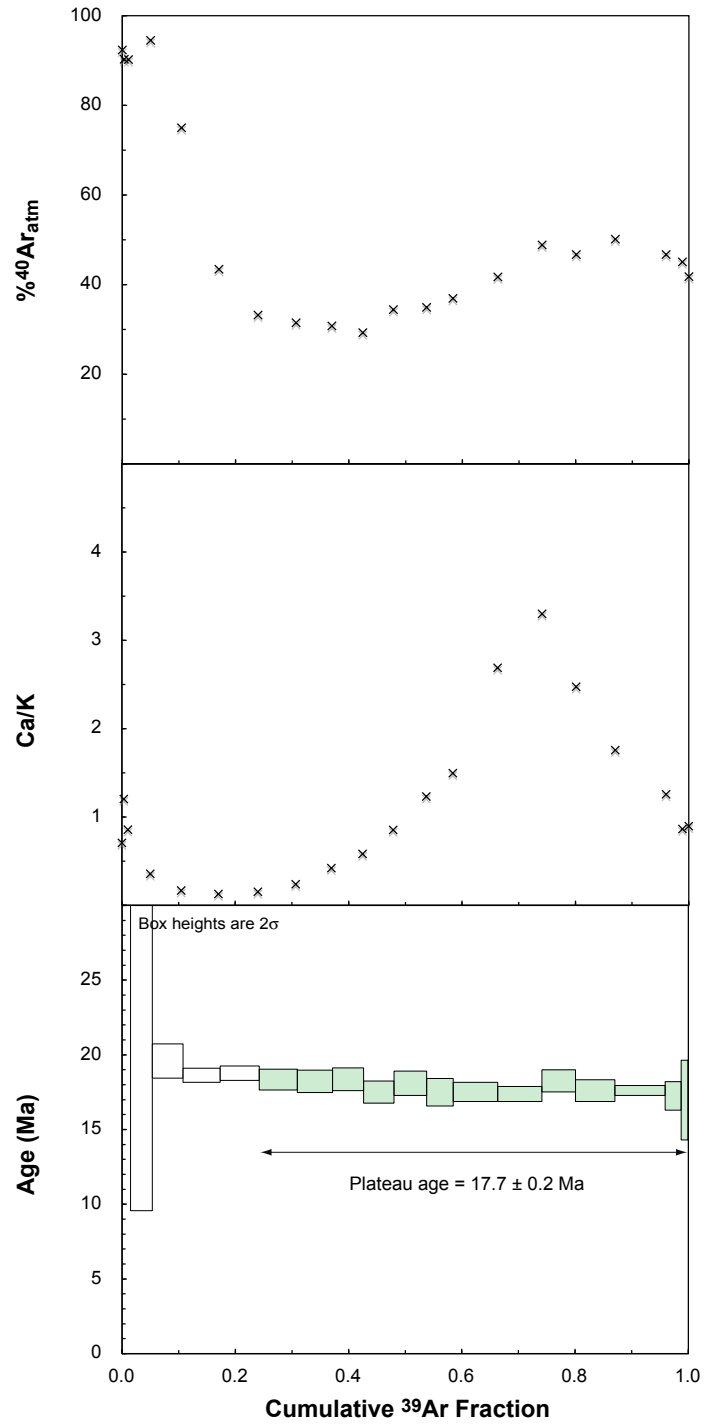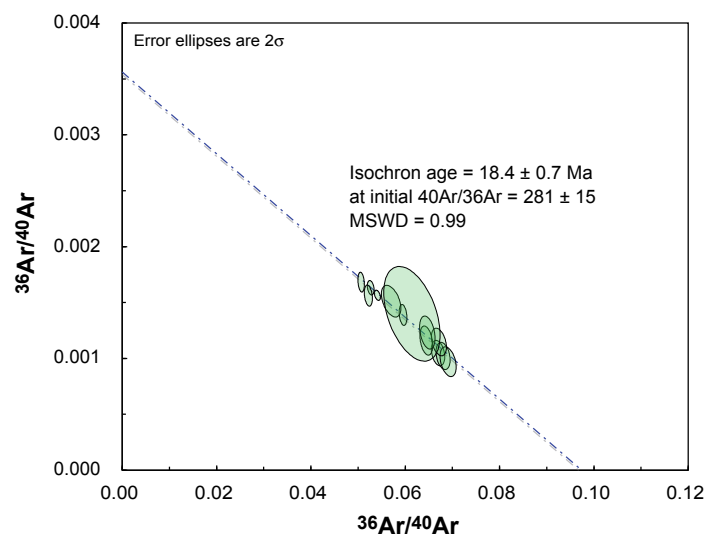

**755-2 + 759-3 biotite single-crystal analyses**

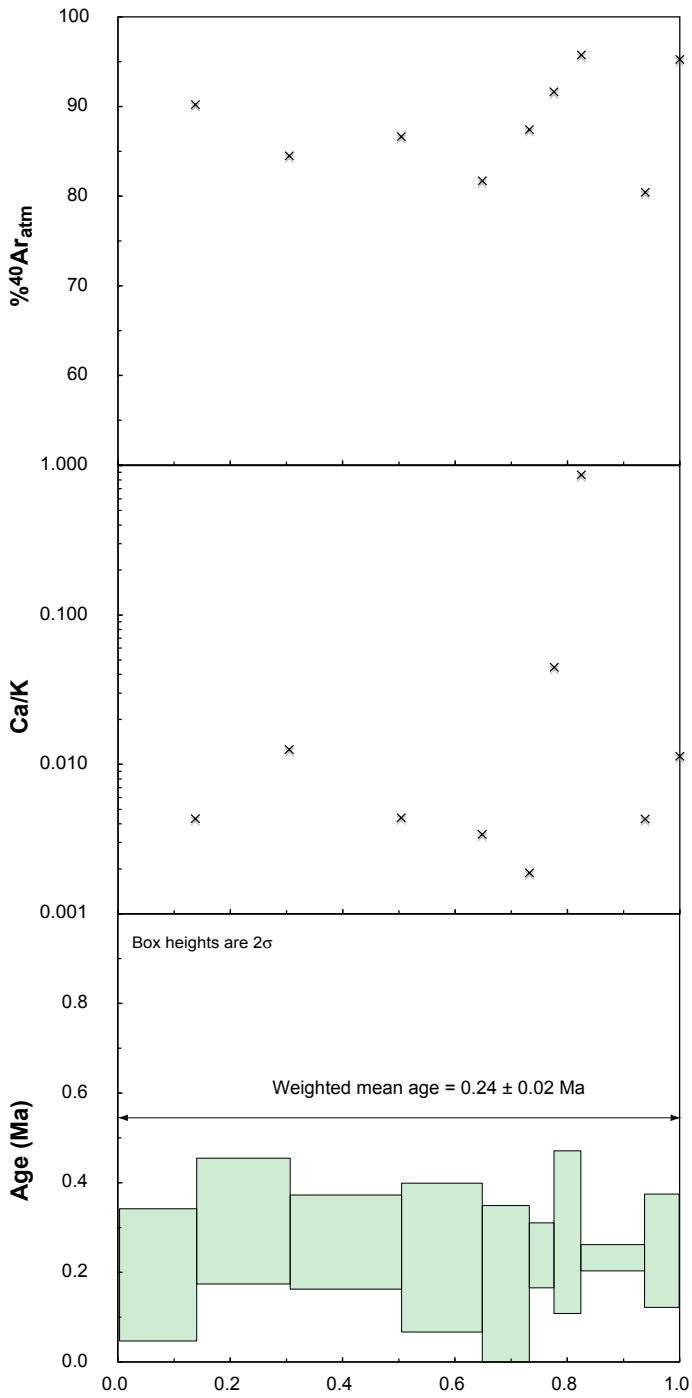

**Cumulative  $^{39}\text{Ar}$  Fraction**

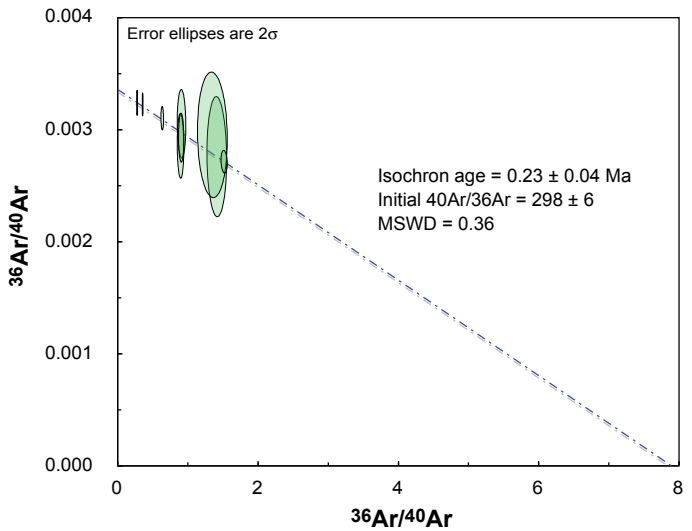

**666-2 biotite single-crystal analyses**

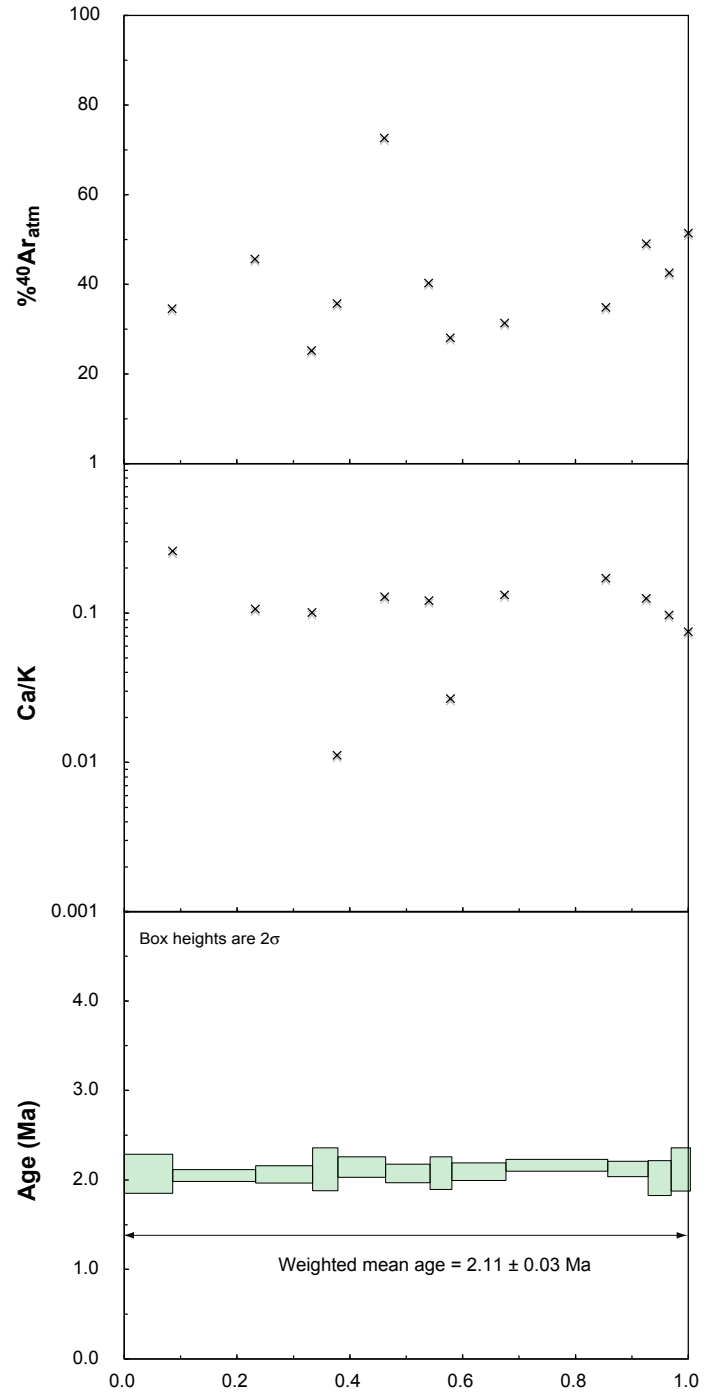

**Cumulative  $^{39}\text{Ar}$  Fraction**

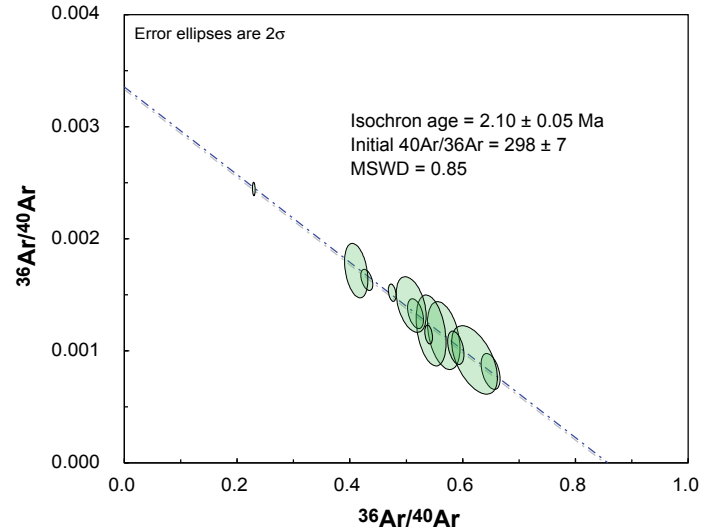

**706-1 K-feldspar step-heating analysis**

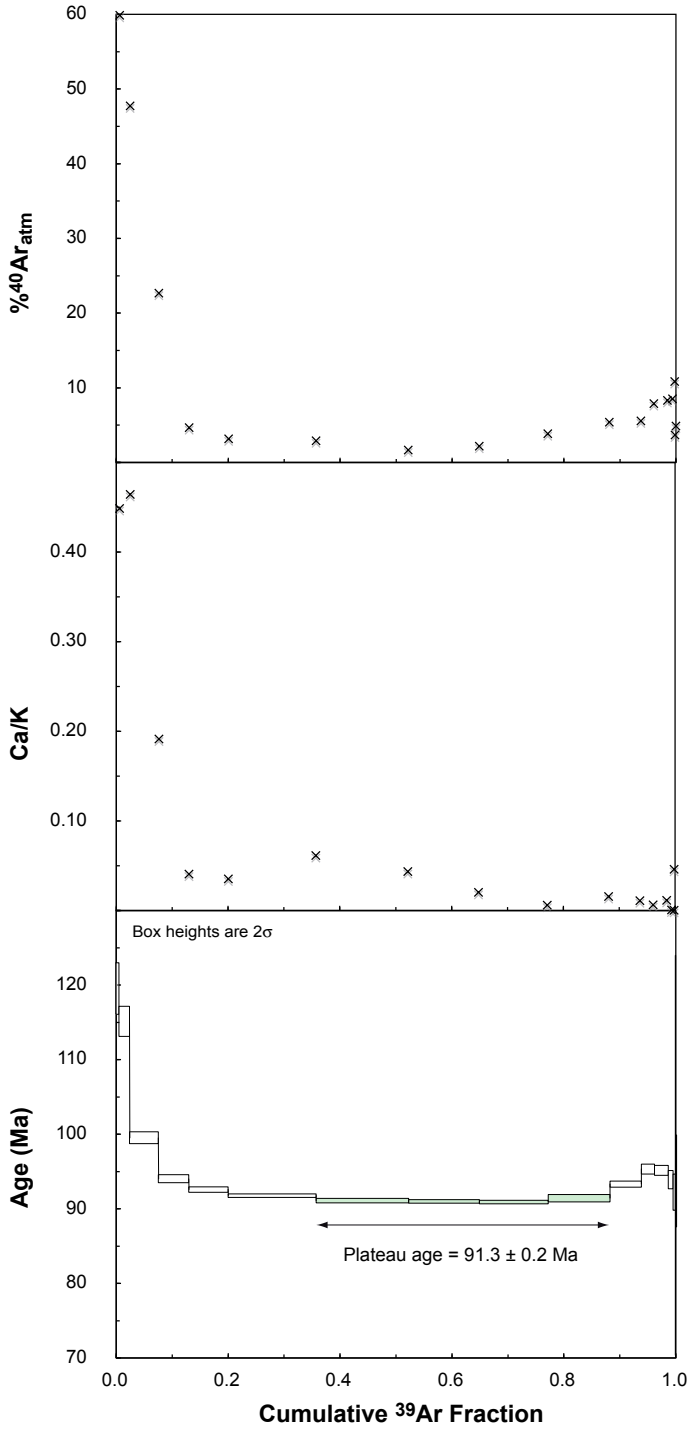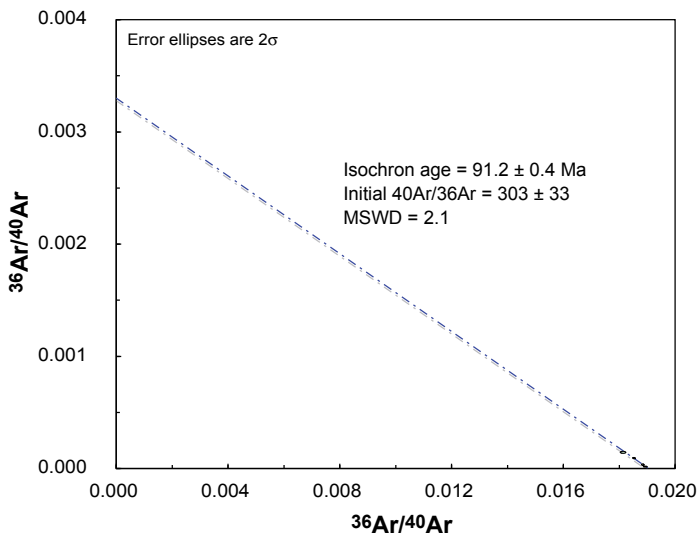

**699-1 K-feldspar single-crystal analyses**

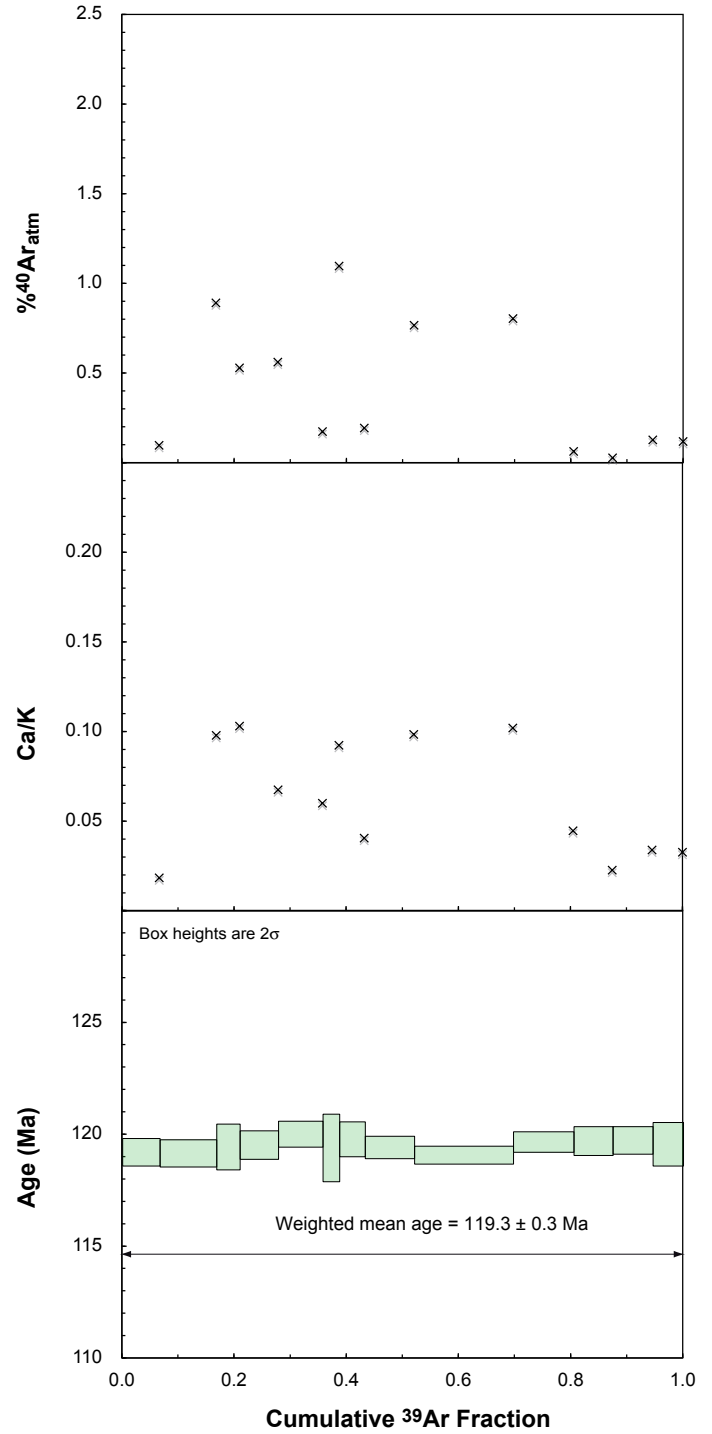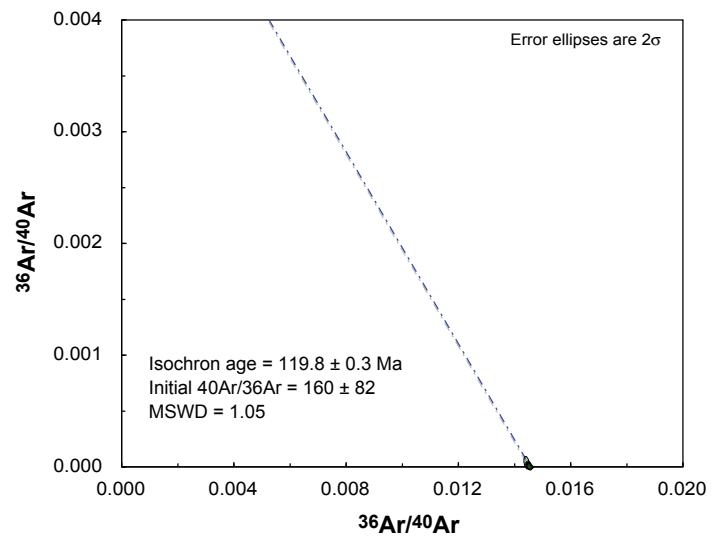

**693-2 plagioclase single-crystal analyses**

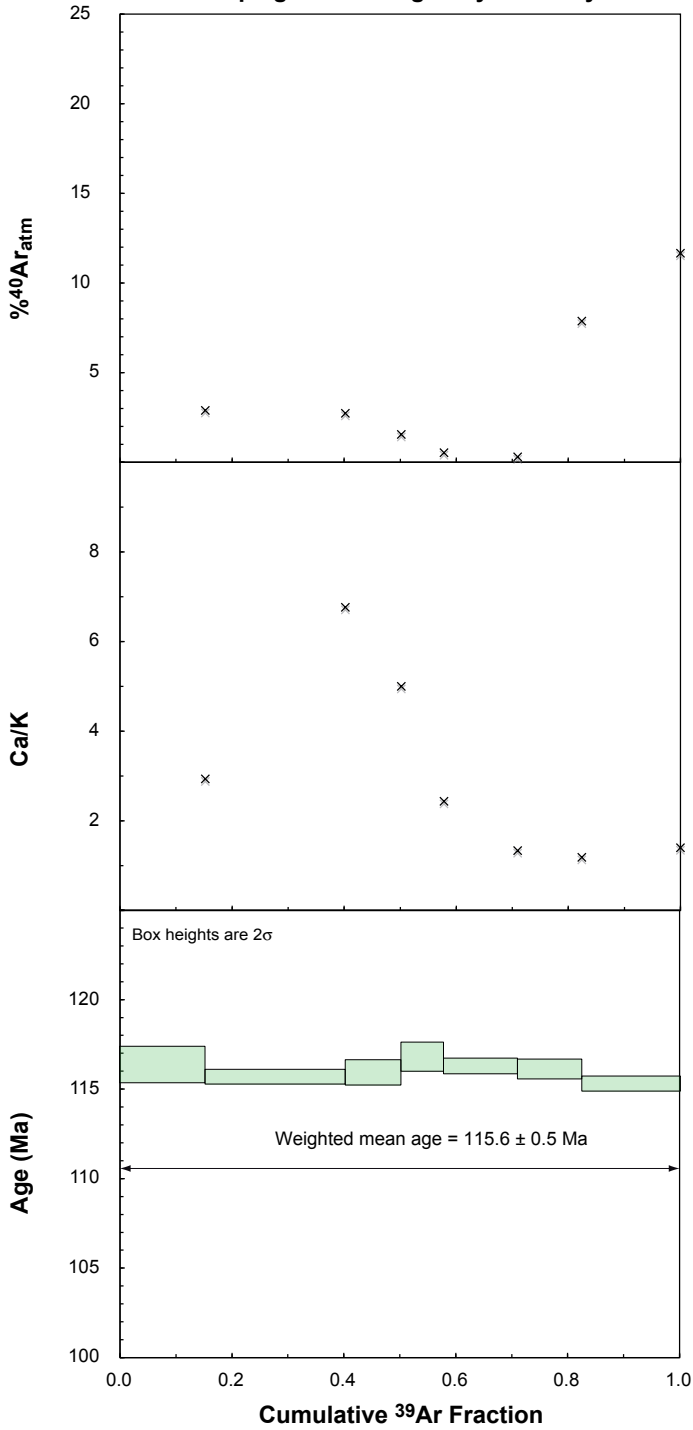

**693-2 hornblende single-crystal analyses**

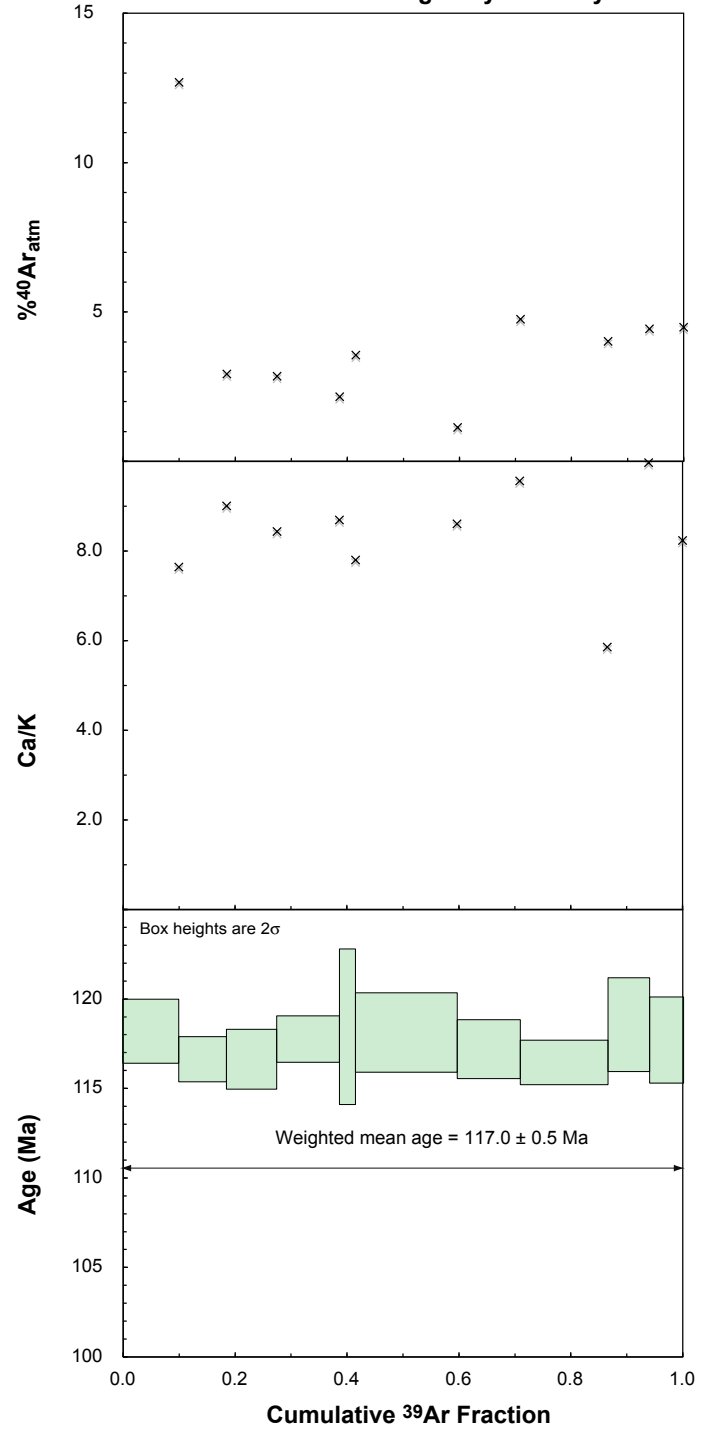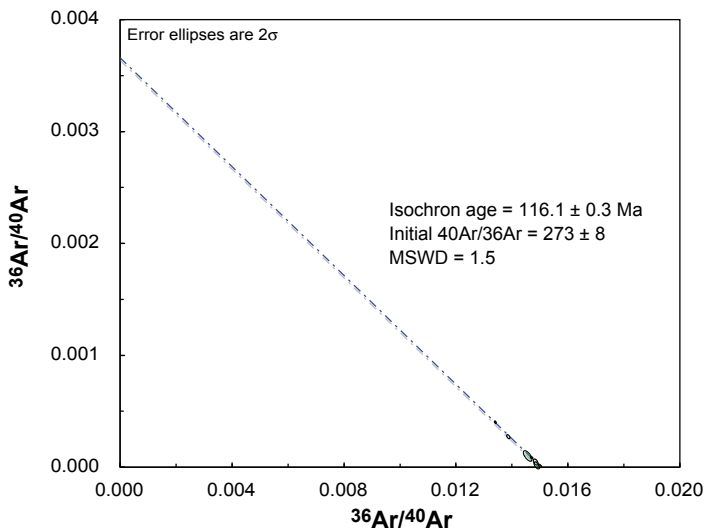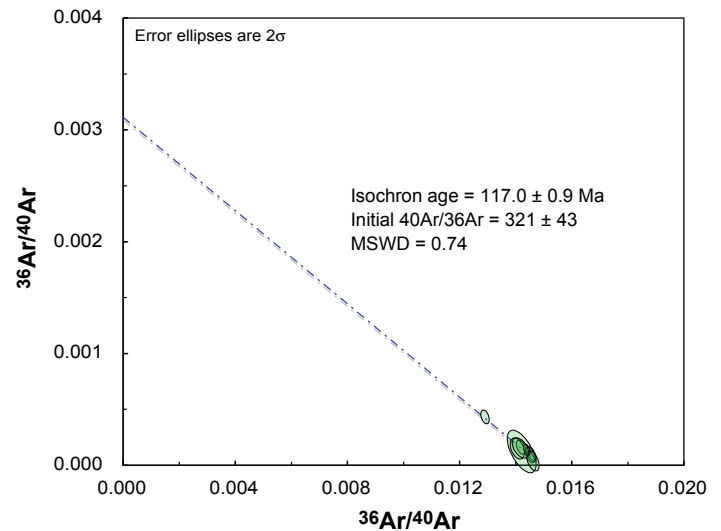

**692-3 K-feldspar single-crystal analyses**

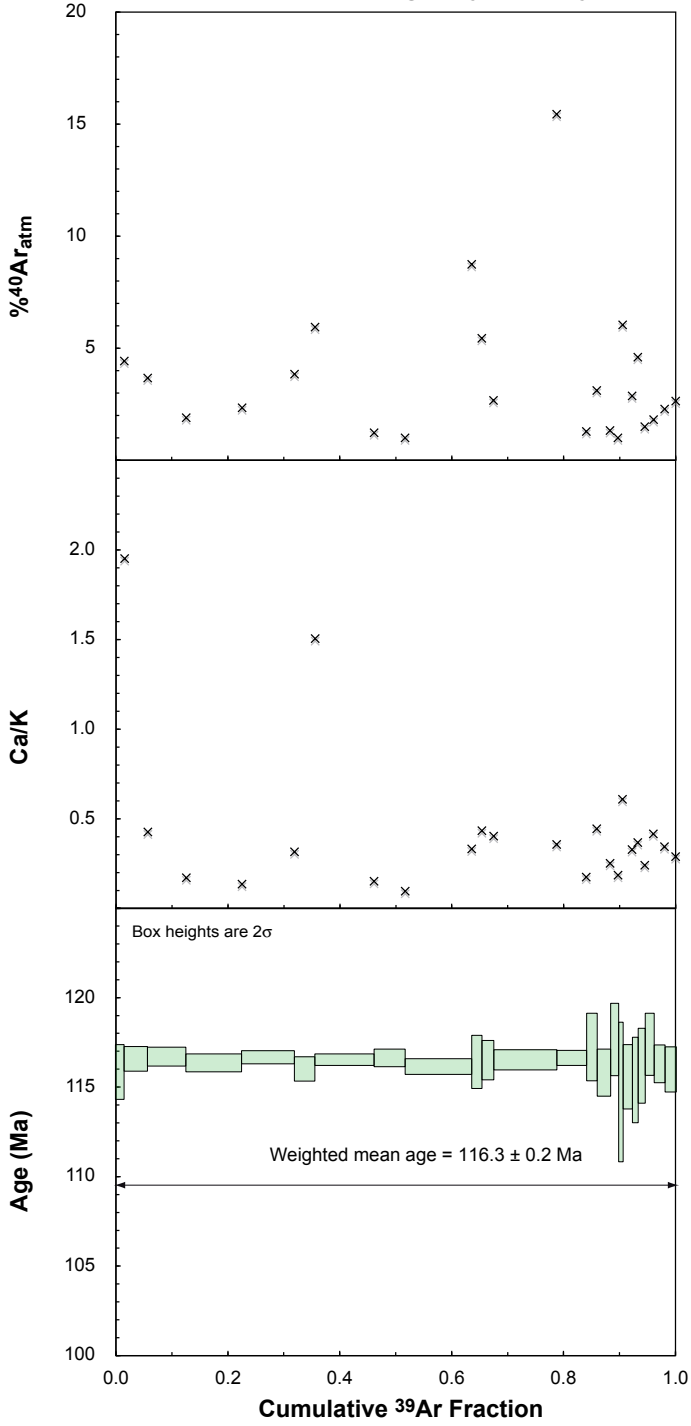

**692-3 hornblende single-crystal analyses**

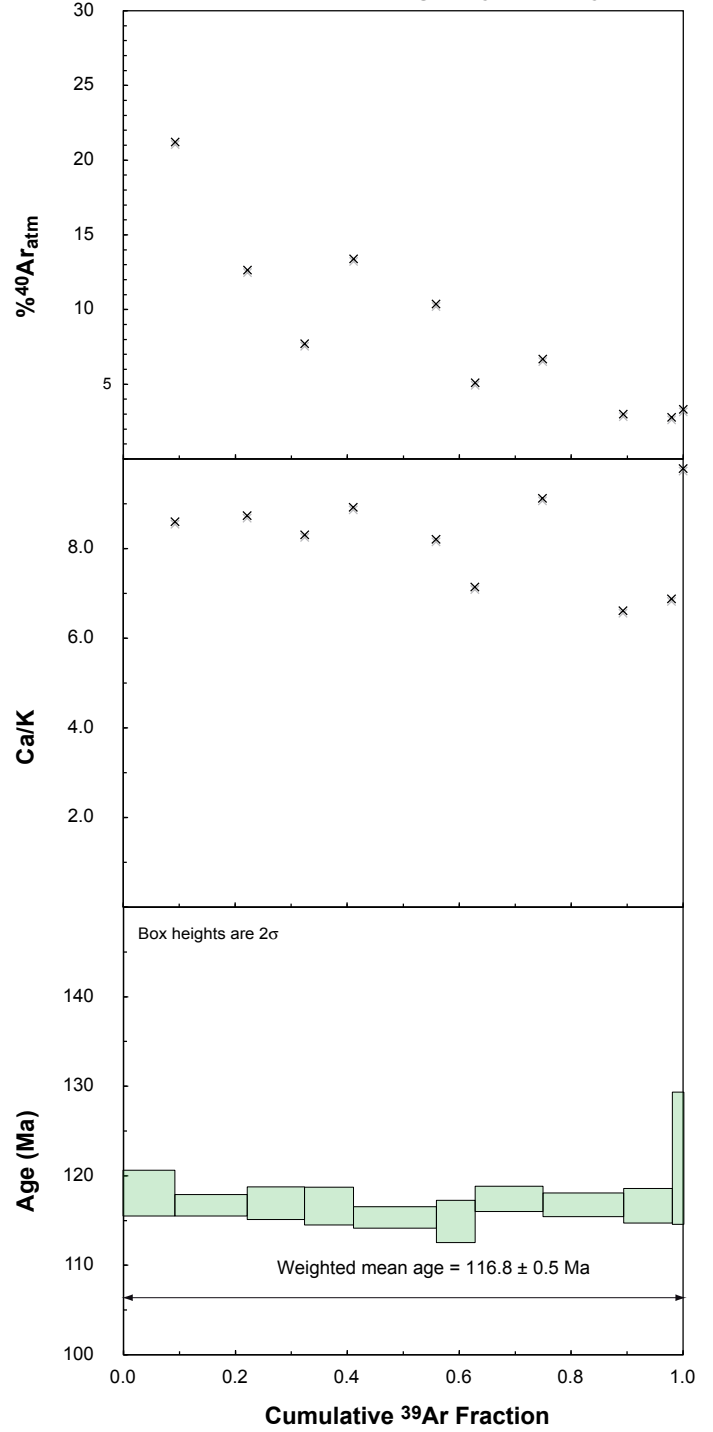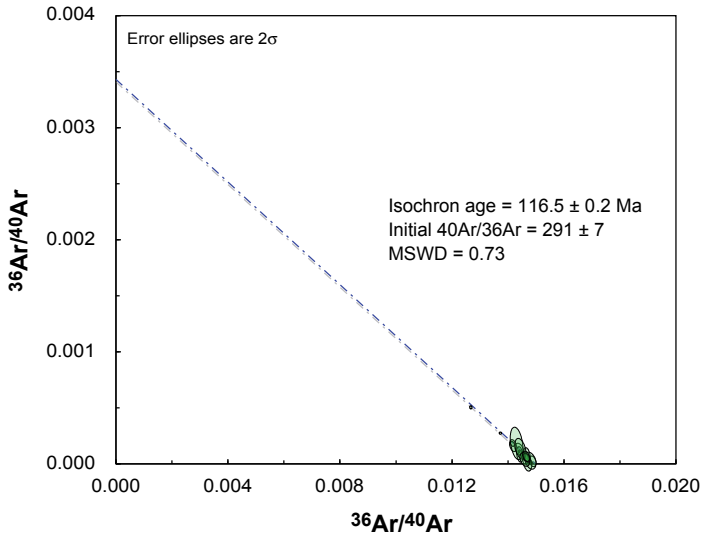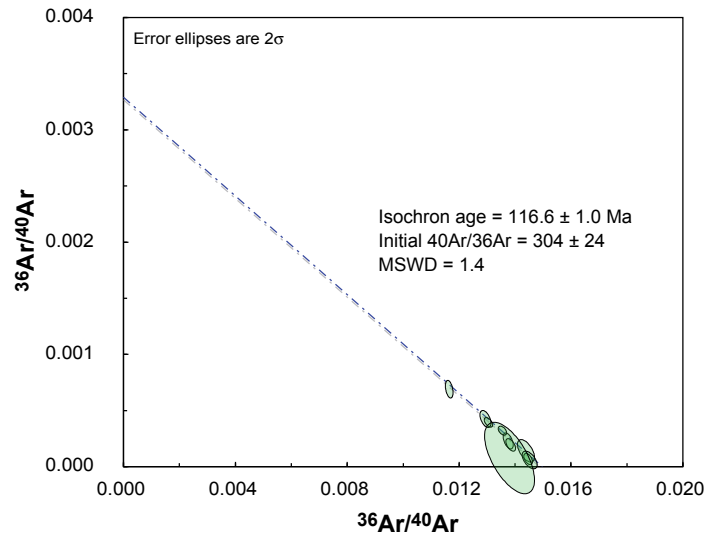

### 692-1 matrix step-heating analysis

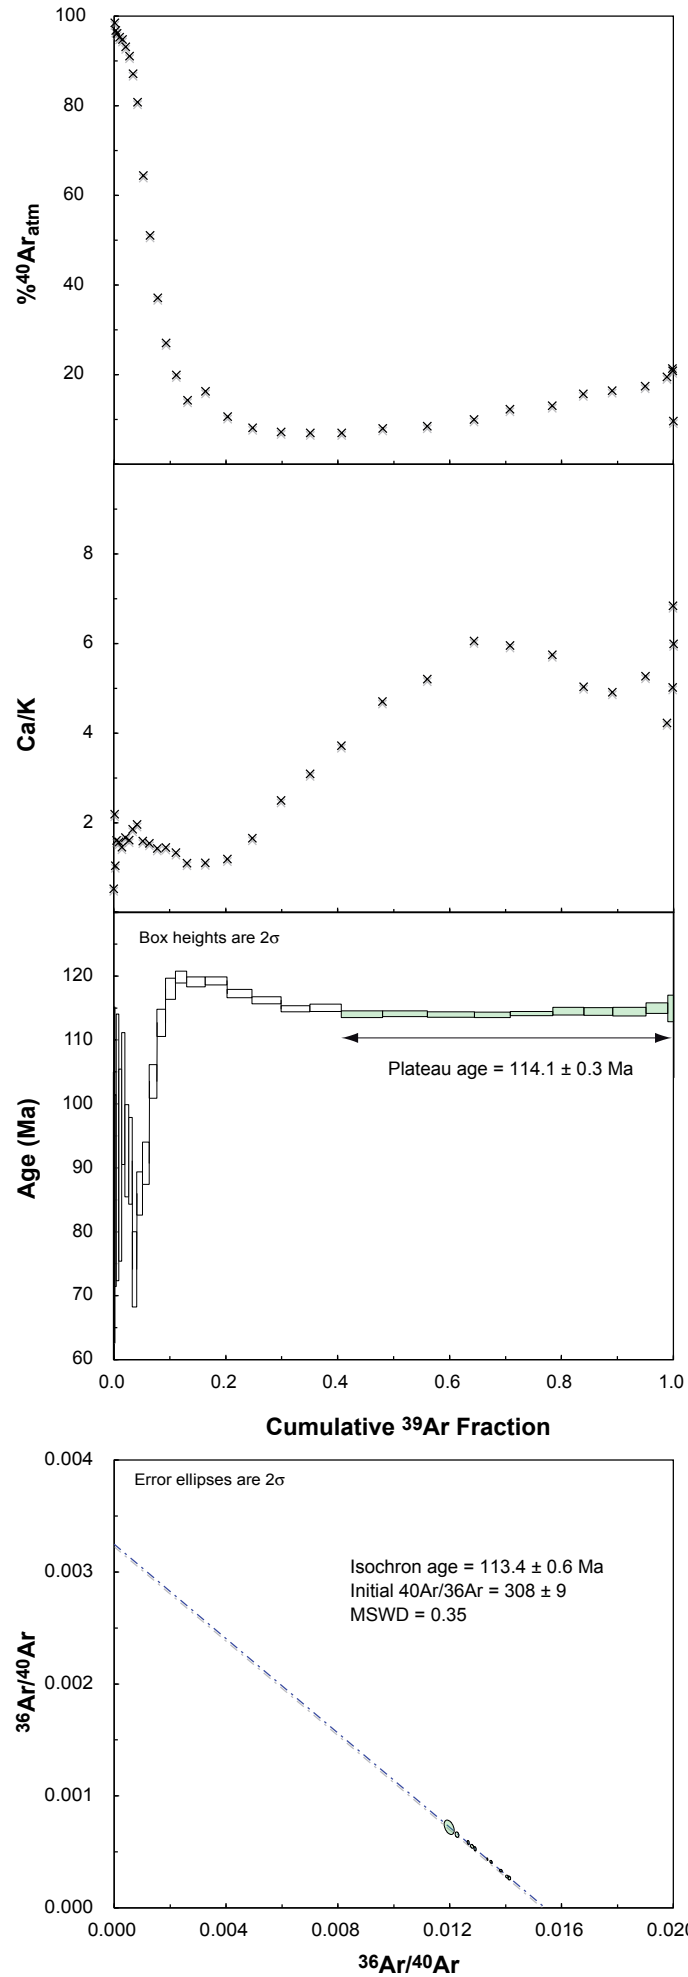



689-2 plagioclase single-crystal analyses

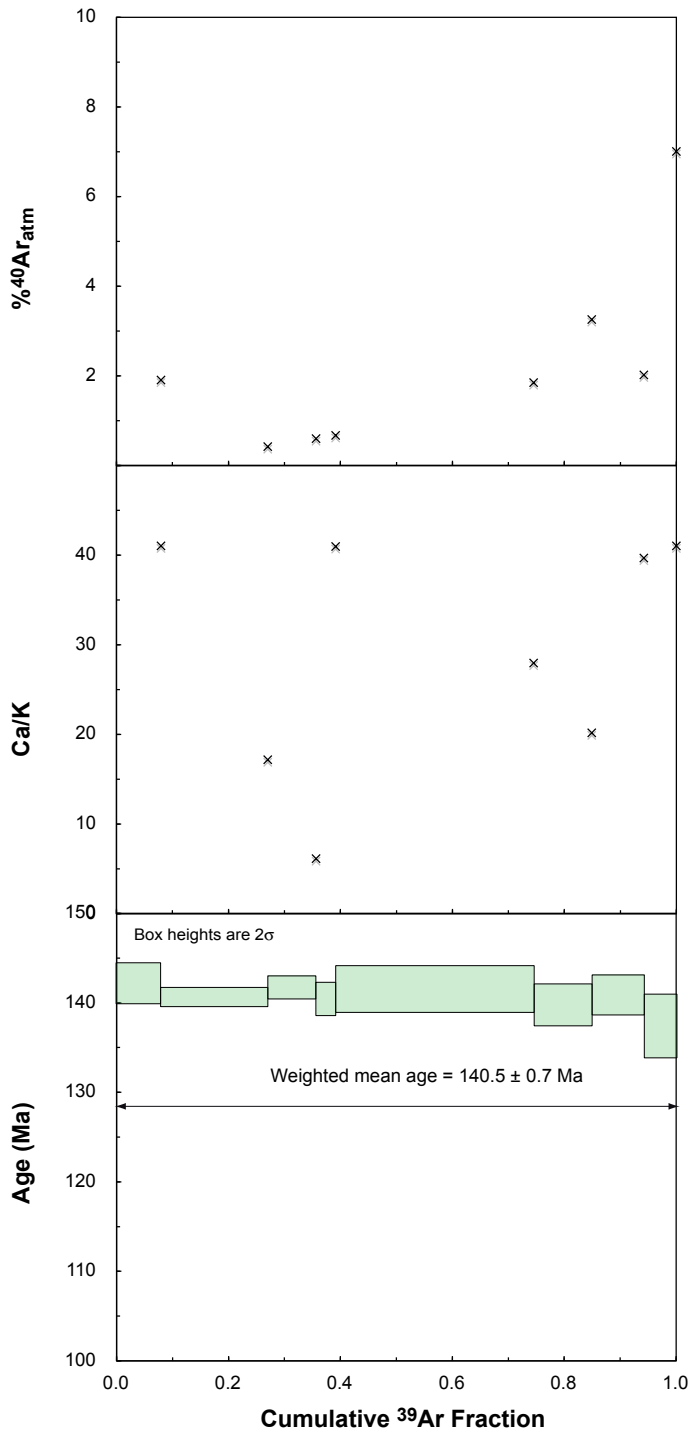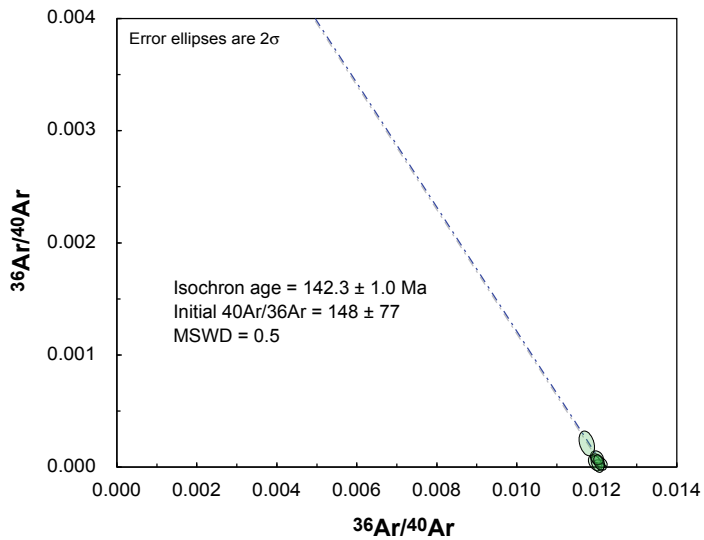

689-5 plagioclase single-crystal analyses

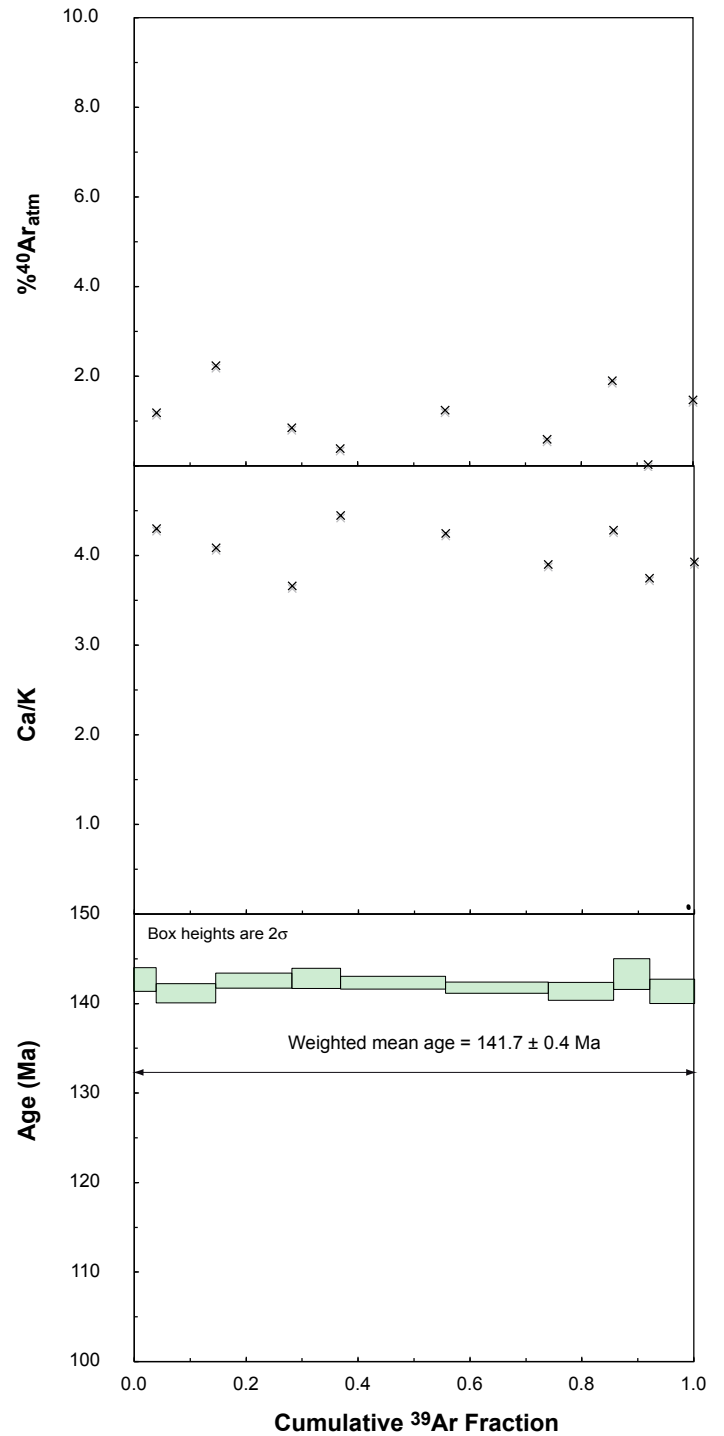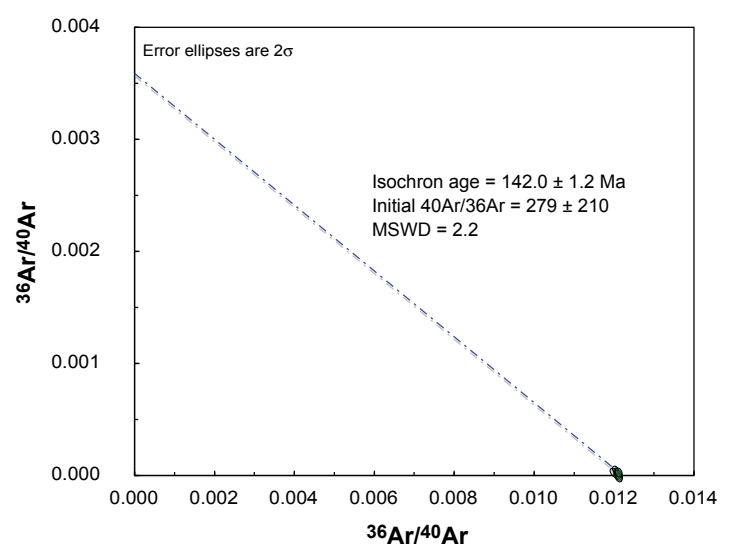

**678-2 K-feldspar single-crystal analyses**

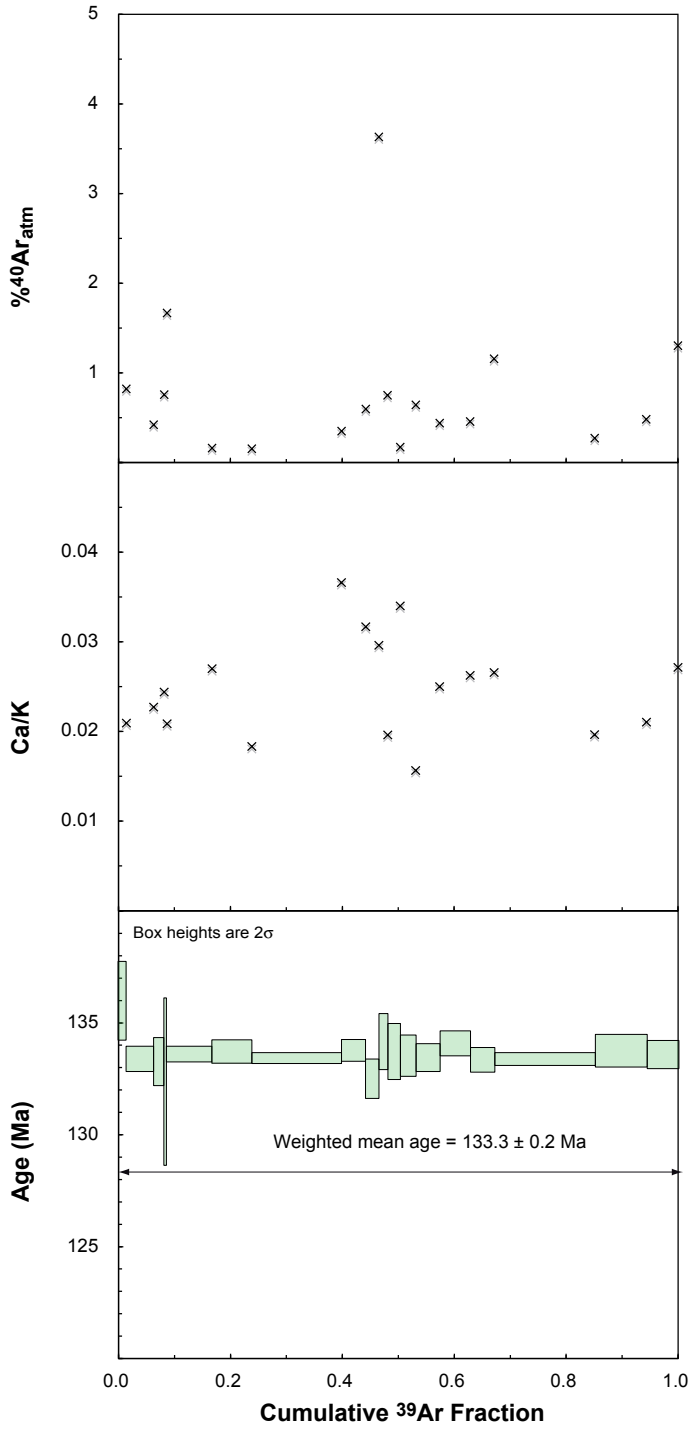

**678-2 hornblende single-crystal analyses**

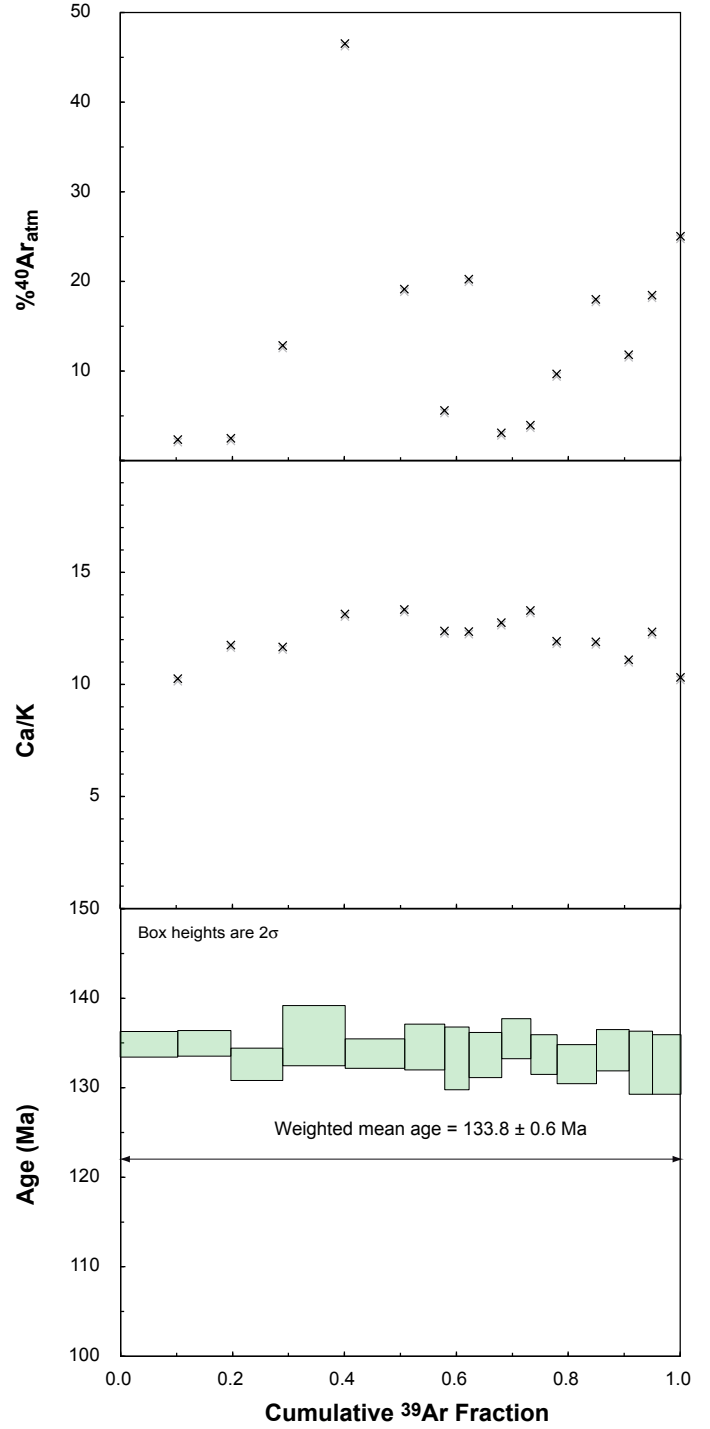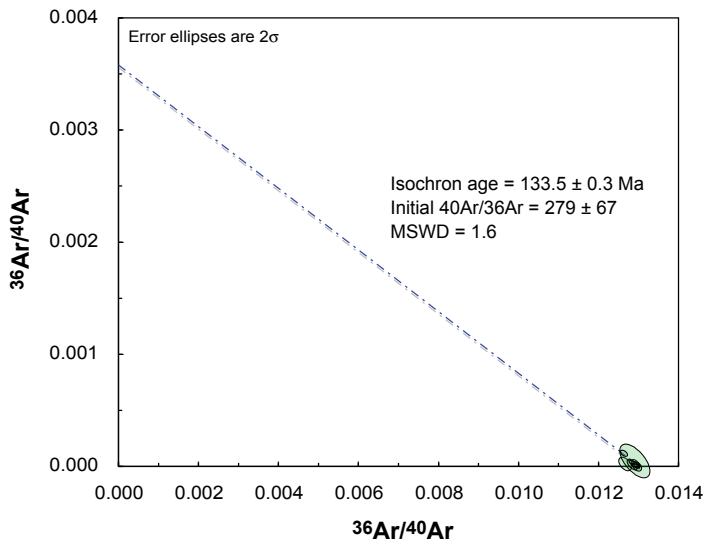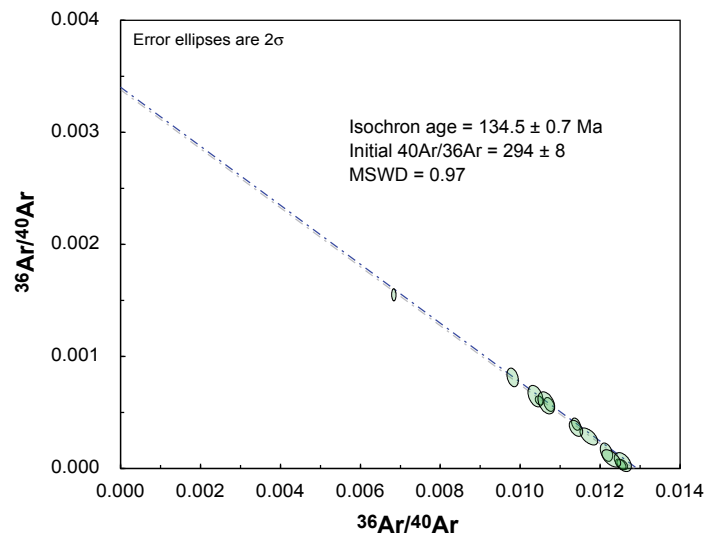

Supplement: srep02107-s1.pdf [file srep02107-s1.pdf]
